# Supplementary material for: Comprehensive Genomic Analysis of a BRCA2 Deficient Human Pancreatic Cancer
Source: PLoS One. 2011 Jul 5;6(7):e21639. doi: 10.1371/journal.pone.0021639 (PMC3130048; doi:10.1371/journal.pone.0021639)
Supplement: Table S1 — Coverage variation in Capan-1 whole genome sequence. Median, mean, minimum and maximum values of the depth are shown for each cytoband region. In addition, global median value of the depth for each chromosome and for the whole genome are shown. (XLS) [file pone.0021639.s001.xls]

## Sheet: Sheet1
Table S1: Coverage variation in Capan-1 whole genome sequence.
CAPAN1_WG
	cytoband
chr	start	end	median	mean	min	max
1	0	2300000	4	21	0	8563			Median	8.55104
1	2300000	5400000	6	6	0	207
1	5400000	7200000	7	6	0	117
1	7200000	9200000	7	7	0	25			chr	length	bases	coverage
1	9200000	12700000	7	7	0	44			1	249250621	222443438	0.892449
1	12700000	16200000	7	6	0	45			2	243199373	235944704	0.97017
1	16200000	20400000	7	8	0	88			3	198022430	192932205	0.974295
1	20400000	23900000	7	7	0	28			4	191154276	184880643	0.96718
1	23900000	28000000	7	7	0	32			5	180915260	173932184	0.961401
1	28000000	30200000	7	6	0	26			6	171115067	164927523	0.96384
1	30200000	32400000	7	7	0	67			7	159138663	153786242	0.966366
1	32400000	34600000	8	8	0	33			8	146364022	141079375	0.963894
1	34600000	40100000	11	11	0	44			9	141213431	111894927	0.792382
1	40100000	44100000	11	11	0	35			10	135534747	129837648	0.957966
1	44100000	46800000	11	11	0	34			11	135006516	129818439	0.961572
1	46800000	50700000	11	10	0	41			12	133851895	129033380	0.964001
1	50700000	56100000	11	11	0	35			13	115169878	94666870	0.821976
1	56100000	59000000	11	11	0	66			14	107349540	87431393	0.814455
1	59000000	61300000	12	11	0	32			15	102531392	80849057	0.78853
1	61300000	68900000	11	11	0	126			16	90354753	77799766	0.861048
1	68900000	69700000	11	10	0	32			17	81195210	76953288	0.947756
1	69700000	84900000	10	10	0	91			18	78077248	72657953	0.930591
1	84900000	88400000	12	11	0	48			19	59128983	54889693	0.928304
1	88400000	92000000	11	11	0	1123			20	63025520	58460887	0.927575
1	92000000	94700000	12	11	0	33			21	48129895	34793074	0.722899
1	94700000	99700000	11	10	0	33			22	51304566	34422281	0.67094
1	99700000	102200000	11	11	0	31			X	155270560	143464472	0.923964
1	102200000	107200000	10	9	0	37			Y	59373566	2040109	0.0343606
1	107200000	111800000	11	11	0	47			total	3095677412	2788939551	0.900914
1	111800000	116100000	11	11	0	38			total -Y	3036303846	2786899442	0.917859
1	116100000	117800000	12	11	0	108
1	117800000	120600000	11	11	0	65
1	120600000	121500000	10	82	0	169747
1	121500000	125000000	0	0	0	0
1	125000000	128900000	0	0	0	0
1	128900000	142600000	0	0	0	332
1	142600000	147000000	10	12	0	1413
1	147000000	150300000	10	10	0	107
1	150300000	155000000	11	11	0	68
1	155000000	156500000	11	10	0	158
1	156500000	159100000	11	10	0	43
1	159100000	160500000	11	11	0	91
1	160500000	165500000	11	11	0	73
1	165500000	167200000	11	10	0	37
1	167200000	170900000	11	11	0	62
1	170900000	172900000	11	11	0	61
1	172900000	176000000	11	10	0	39
1	176000000	180300000	11	10	0	72
1	180300000	185800000	8	7	0	32
1	185800000	190800000	7	6	0	30
1	190800000	193800000	7	6	0	25
1	193800000	198700000	7	6	0	99
1	198700000	207200000	7	7	0	51
1	207200000	211500000	7	7	0	81
1	211500000	214500000	8	7	0	24
1	214500000	224100000	9	9	0	55
1	224100000	224600000	11	10	0	529
1	224600000	227000000	11	11	0	36
1	227000000	230700000	11	11	0	58
1	230700000	234700000	12	11	0	38
1	234700000	236600000	11	11	0	306
1	236600000	243700000	11	10	0	122
1	243700000	249250621	11	10	0	100
2	0	4400000	7	6	0	47
2	4400000	7100000	7	6	0	59
2	7100000	12200000	7	7	0	47
2	12200000	16700000	7	7	0	76
2	16700000	19200000	7	7	0	25
2	19200000	24000000	10	10	0	121
2	24000000	27900000	11	11	0	42
2	27900000	30000000	12	12	0	37
2	30000000	32100000	11	11	0	32
2	32100000	36600000	10	10	0	360
2	36600000	38600000	12	11	0	37
2	38600000	41800000	11	10	0	38
2	41800000	47800000	12	11	0	44
2	47800000	52900000	10	10	0	34
2	52900000	55000000	11	11	0	31
2	55000000	61300000	11	10	0	32
2	61300000	64100000	11	11	0	37
2	64100000	68600000	12	11	0	39
2	68600000	71500000	12	11	0	37
2	71500000	73500000	11	11	0	41
2	73500000	75000000	12	12	0	46
2	75000000	83300000	11	11	0	62
2	83300000	90500000	14	14	0	4836
2	90500000	93300000	0	13	0	24445
2	93300000	96800000	0	4	0	79
2	96800000	102700000	11	11	0	47
2	102700000	106000000	11	10	0	32
2	106000000	107500000	11	11	0	36
2	107500000	110200000	11	10	0	281
2	110200000	114400000	11	11	0	78
2	114400000	118800000	10	10	0	34
2	118800000	122400000	11	10	0	55
2	122400000	129900000	10	10	0	66
2	129900000	132500000	10	10	0	41
2	132500000	135100000	11	11	0	915
2	135100000	136800000	11	11	0	39
2	136800000	142200000	10	10	0	43
2	142200000	144100000	8	8	0	36
2	144100000	148700000	7	7	0	25
2	148700000	149900000	7	6	0	4031
2	149900000	150500000	8	7	0	22
2	150500000	154900000	7	7	0	26
2	154900000	159800000	7	7	0	49
2	159800000	163700000	7	7	0	794
2	163700000	169700000	7	7	0	27
2	169700000	178000000	7	7	0	27
2	178000000	180600000	7	7	0	25
2	180600000	183000000	7	7	0	31
2	183000000	189400000	9	8	0	84
2	189400000	191900000	11	11	0	37
2	191900000	197400000	9	9	0	42
2	197400000	203300000	11	11	0	66
2	203300000	204900000	11	11	0	66
2	204900000	209000000	11	11	0	33
2	209000000	215300000	10	10	0	41
2	215300000	221500000	11	11	0	38
2	221500000	225200000	11	10	0	34
2	225200000	226100000	8	8	0	24
2	226100000	231000000	8	8	0	31
2	231000000	235600000	8	8	0	40
2	235600000	237300000	7	7	0	25
2	237300000	243199373	7	6	0	102
3	0	2800000	7	7	0	42
3	2800000	4000000	8	7	0	24
3	4000000	8700000	8	8	0	42
3	8700000	11800000	8	8	0	45
3	11800000	13300000	8	8	0	61
3	13300000	16400000	8	8	0	56
3	16400000	23900000	8	7	0	120
3	23900000	26400000	8	8	0	28
3	26400000	30900000	8	7	0	38
3	30900000	32100000	8	8	0	25
3	32100000	36500000	10	10	0	117
3	36500000	39400000	13	12	0	36
3	39400000	43700000	12	12	0	56
3	43700000	44100000	12	11	0	29
3	44100000	44200000	12	11	0	29
3	44200000	50600000	11	11	0	33
3	50600000	52300000	11	11	0	33
3	52300000	54400000	11	11	0	33
3	54400000	58600000	11	11	0	62
3	58600000	63700000	8	8	0	30
3	63700000	69800000	8	7	0	51
3	69800000	74200000	8	7	0	123
3	74200000	79800000	7	7	0	386
3	79800000	83500000	7	7	0	26
3	83500000	87200000	7	7	0	32
3	87200000	87900000	8	7	0	23
3	87900000	91000000	6	6	0	278
3	91000000	93900000	0	1	0	124
3	93900000	98300000	11	11	0	6108
3	98300000	100000000	12	12	0	38
3	100000000	100900000	12	12	0	60
3	100900000	102800000	12	12	0	36
3	102800000	106200000	9	9	0	34
3	106200000	107900000	8	8	0	87
3	107900000	111300000	8	7	0	41
3	111300000	113500000	9	8	0	28
3	113500000	117300000	8	7	0	27
3	117300000	119000000	8	7	0	26
3	119000000	121900000	8	8	0	114
3	121900000	123800000	12	11	0	32
3	123800000	125800000	11	11	0	42
3	125800000	129200000	11	10	0	35
3	129200000	133700000	11	10	0	38
3	133700000	135700000	11	11	0	35
3	135700000	138700000	11	11	0	32
3	138700000	142800000	11	11	0	34
3	142800000	148900000	10	10	0	36
3	148900000	152100000	14	13	0	40
3	152100000	155000000	14	13	0	36
3	155000000	157000000	15	15	0	42
3	157000000	159000000	15	14	0	43
3	159000000	160700000	15	15	0	42
3	160700000	167600000	13	13	0	39
3	167600000	170900000	15	15	0	43
3	170900000	175700000	14	14	0	153
3	175700000	179000000	15	14	0	39
3	179000000	182700000	15	14	0	42
3	182700000	184500000	15	14	0	75
3	184500000	186000000	16	15	0	42
3	186000000	187900000	16	15	0	40
3	187900000	192300000	15	14	0	50
3	192300000	198022430	15	15	0	22535
4	0	4500000	3	3	0	149
4	4500000	6000000	4	3	0	23
4	6000000	11300000	7	6	0	110
4	11300000	15200000	7	7	0	35
4	15200000	17800000	8	7	0	26
4	17800000	21300000	7	7	0	34
4	21300000	27700000	7	7	0	28
4	27700000	35800000	7	6	0	253
4	35800000	41200000	8	7	0	84
4	41200000	44600000	7	7	0	32
4	44600000	48200000	7	6	0	893
4	48200000	50400000	5	13	0	7920
4	50400000	52700000	0	0	0	41
4	52700000	59500000	7	7	0	154
4	59500000	66600000	6	6	0	106
4	66600000	70500000	7	6	0	2069
4	70500000	76300000	7	7	0	33
4	76300000	78900000	8	8	0	202
4	78900000	82400000	7	7	0	153
4	82400000	84100000	8	7	0	85
4	84100000	86900000	7	7	0	29
4	86900000	88000000	7	7	0	40
4	88000000	93700000	7	7	0	24
4	93700000	95100000	7	6	0	26
4	95100000	98800000	7	6	0	26
4	98800000	101100000	7	7	0	27
4	101100000	107700000	7	7	0	56
4	107700000	114100000	7	7	0	45
4	114100000	120800000	7	6	0	32
4	120800000	123800000	7	7	0	24
4	123800000	128800000	9	8	0	48
4	128800000	131100000	11	10	0	33
4	131100000	139500000	10	9	0	118
4	139500000	141500000	9	9	0	44
4	141500000	146800000	7	7	0	32
4	146800000	148500000	7	7	0	66
4	148500000	151100000	7	7	0	27
4	151100000	155600000	8	7	0	28
4	155600000	161800000	7	7	0	347
4	161800000	164500000	7	6	0	675
4	164500000	170100000	7	7	0	192
4	170100000	171900000	7	7	0	33
4	171900000	176300000	7	7	0	55
4	176300000	177500000	7	7	0	24
4	177500000	183200000	7	6	0	66
4	183200000	187100000	7	7	0	34
4	187100000	191154276	7	8	0	1673
5	0	4500000	19	18	0	227
5	4500000	6300000	21	20	0	52
5	6300000	9800000	21	20	0	53
5	9800000	15000000	19	18	0	146
5	15000000	18400000	18	17	0	836
5	18400000	23300000	16	16	0	183
5	23300000	24600000	16	16	0	41
5	24600000	28900000	16	16	0	47
5	28900000	33800000	18	17	0	64
5	33800000	38400000	16	16	0	200
5	38400000	42500000	11	10	0	32
5	42500000	46100000	9	8	0	112
5	46100000	48400000	0	0	0	246
5	48400000	50700000	3	5	0	1425
5	50700000	58900000	7	7	0	33
5	58900000	62900000	7	7	0	47
5	62900000	63200000	7	6	0	22
5	63200000	66700000	7	7	0	103
5	66700000	68400000	8	7	0	35
5	68400000	73300000	7	6	0	345
5	73300000	76900000	8	7	0	27
5	76900000	81400000	8	8	0	7101
5	81400000	82800000	7	7	0	24
5	82800000	92300000	7	7	0	34
5	92300000	98200000	4	3	0	2781
5	98200000	102800000	3	3	0	2925
5	102800000	104500000	3	3	0	15
5	104500000	109600000	3	3	0	23
5	109600000	111500000	3	3	0	17
5	111500000	113100000	4	3	0	16
5	113100000	115200000	4	3	0	102
5	115200000	121400000	3	3	0	25
5	121400000	127300000	4	3	0	52
5	127300000	130600000	3	3	0	63
5	130600000	136200000	4	6	0	8172
5	136200000	139500000	8	7	0	33
5	139500000	144500000	14	13	0	62
5	144500000	149800000	15	14	0	70
5	149800000	152700000	14	14	0	41
5	152700000	155700000	14	14	0	43
5	155700000	159900000	15	14	0	50
5	159900000	168500000	13	13	0	69
5	168500000	172800000	14	14	0	39
5	172800000	176600000	14	14	0	530
5	176600000	180915260	13	12	0	303
6	0	2300000	7	7	0	52
6	2300000	4200000	8	7	0	28
6	4200000	7100000	7	7	0	26
6	7100000	10600000	7	7	0	37
6	10600000	11600000	8	7	0	27
6	11600000	13400000	8	7	0	25
6	13400000	15200000	7	7	0	23
6	15200000	25200000	7	7	0	68
6	25200000	27000000	7	7	0	68
6	27000000	30400000	7	7	0	26
6	30400000	32100000	7	7	0	27
6	32100000	33500000	7	7	0	66
6	33500000	36600000	8	8	0	34
6	36600000	40500000	8	8	0	112
6	40500000	46200000	8	8	0	49
6	46200000	51800000	8	8	0	39
6	51800000	52900000	9	8	0	27
6	52900000	57000000	8	7	0	30
6	57000000	58700000	6	7	0	93
6	58700000	61000000	0	16	0	15008
6	61000000	63300000	2	3	0	2458
6	63300000	63400000	7	7	0	21
6	63400000	70000000	6	6	0	32
6	70000000	75900000	7	7	0	45
6	75900000	83900000	7	7	0	61
6	83900000	84900000	7	7	0	48
6	84900000	88000000	7	7	0	198
6	88000000	93100000	7	7	0	31
6	93100000	99500000	7	6	0	76
6	99500000	100600000	7	7	0	24
6	100600000	105500000	7	6	0	28
6	105500000	114600000	4	4	0	30
6	114600000	118300000	4	3	0	143
6	118300000	118500000	3	3	0	27
6	118500000	126100000	7	7	0	185
6	126100000	127100000	8	8	0	28
6	127100000	130300000	8	8	0	56
6	130300000	131200000	8	8	0	23
6	131200000	135200000	8	8	0	47
6	135200000	139000000	8	8	0	32
6	139000000	142800000	8	7	0	30
6	142800000	145600000	8	8	0	25
6	145600000	149000000	8	7	0	35
6	149000000	152500000	8	8	0	29
6	152500000	155500000	8	8	0	36
6	155500000	161000000	8	8	0	326
6	161000000	164500000	8	7	0	98
6	164500000	171115067	7	7	0	105
7	0	2800000	12	12	0	321
7	2800000	4500000	16	15	0	45
7	4500000	7300000	15	14	0	121
7	7300000	13800000	15	15	0	42
7	13800000	16500000	15	15	0	64
7	16500000	20900000	16	16	0	42
7	20900000	25500000	18	17	0	43
7	25500000	28000000	18	17	0	63
7	28000000	28800000	18	18	0	41
7	28800000	35000000	17	17	0	66
7	35000000	37200000	17	17	0	45
7	37200000	43300000	17	16	0	59
7	43300000	45400000	14	14	0	2556
7	45400000	49000000	15	14	0	52
7	49000000	50500000	13	12	0	38
7	50500000	54000000	14	13	0	94
7	54000000	58000000	14	13	0	641
7	58000000	59900000	0	0	0	136
7	59900000	61700000	0	2	0	2920
7	61700000	67000000	13	19	0	36196
7	67000000	72200000	14	13	0	60
7	72200000	77500000	13	12	0	50
7	77500000	86400000	16	16	0	74
7	86400000	88200000	14	14	0	40
7	88200000	91100000	19	18	0	57
7	91100000	92800000	23	22	0	55
7	92800000	98000000	20	19	0	52
7	98000000	103800000	11	13	0	148
7	103800000	104500000	8	7	0	32
7	104500000	107400000	8	8	0	30
7	107400000	114600000	7	7	0	521
7	114600000	117400000	8	8	0	28
7	117400000	121100000	7	7	0	48
7	121100000	123800000	8	7	0	41
7	123800000	127100000	7	7	0	26
7	127100000	129200000	8	8	0	27
7	129200000	130400000	8	7	0	28
7	130400000	132600000	8	8	0	27
7	132600000	138200000	8	7	0	27
7	138200000	143100000	8	7	0	249
7	143100000	147900000	7	7	0	1020
7	147900000	152600000	8	8	0	121
7	152600000	155100000	11	10	0	39
7	155100000	159138663	11	10	0	272
8	0	2200000	6	6	0	51
8	2200000	6200000	7	7	0	101
8	6200000	12700000	7	6	0	59
8	12700000	19000000	7	7	0	41
8	19000000	23300000	7	7	0	29
8	23300000	27400000	10	10	0	42
8	27400000	28800000	9	9	0	58
8	28800000	36500000	7	7	0	62
8	36500000	38300000	10	10	0	33
8	38300000	39700000	8	8	0	42
8	39700000	43100000	11	11	0	200
8	43100000	45600000	0	4	0	6598
8	45600000	48100000	0	7	0	5539
8	48100000	52200000	12	11	0	38
8	52200000	52600000	11	11	0	30
8	52600000	55500000	10	9	0	77
8	55500000	61600000	8	7	0	45
8	61600000	62200000	8	8	0	24
8	62200000	66000000	8	8	0	48
8	66000000	68000000	8	8	0	30
8	68000000	70500000	7	7	0	25
8	70500000	73900000	8	7	0	711
8	73900000	78300000	7	7	0	30
8	78300000	80100000	7	7	0	29
8	80100000	84600000	8	7	0	190
8	84600000	86900000	7	6	0	364
8	86900000	93300000	10	10	0	36
8	93300000	99000000	13	13	0	57
8	99000000	101600000	15	14	0	1122
8	101600000	106200000	15	14	0	45
8	106200000	110500000	14	14	0	39
8	110500000	112100000	13	13	0	39
8	112100000	117700000	13	13	0	36
8	117700000	119200000	15	15	0	47
8	119200000	122500000	11	11	0	45
8	122500000	127300000	15	14	0	94
8	127300000	131500000	16	16	0	47
8	131500000	136400000	14	14	0	44
8	136400000	139900000	14	13	0	51
8	139900000	146364022	12	11	0	540
9	0	2200000	11	11	0	62
9	2200000	4600000	10	10	0	45
9	4600000	9000000	7	7	0	39
9	9000000	14200000	7	6	0	76
9	14200000	16600000	7	7	0	25
9	16600000	18500000	7	7	0	30
9	18500000	19900000	7	6	0	26
9	19900000	25600000	0	0	0	24
9	25600000	28000000	6	5	0	25
9	28000000	33200000	7	6	0	28
9	33200000	36300000	8	8	0	2529
9	36300000	38400000	7	7	0	24
9	38400000	41000000	5	5	0	31
9	41000000	43600000	5	5	0	3251
9	43600000	47300000	6	6	0	5428
9	47300000	49000000	0	0	0	18
9	49000000	50700000	0	0	0	0
9	50700000	65900000	0	0	0	35
9	65900000	68700000	5	10	0	21512
9	68700000	72200000	9	10	0	20704
9	72200000	74000000	11	11	0	842
9	74000000	79200000	11	11	0	233
9	79200000	81100000	11	11	0	31
9	81100000	84100000	10	10	0	313
9	84100000	86900000	12	11	0	32
9	86900000	90400000	12	11	0	158
9	90400000	91800000	11	10	0	36
9	91800000	93900000	11	10	0	48
9	93900000	96600000	11	10	0	34
9	96600000	99300000	11	11	0	92
9	99300000	102600000	11	11	0	43
9	102600000	108200000	11	10	0	55
9	108200000	111300000	11	10	0	41
9	111300000	114900000	8	8	0	34
9	114900000	117700000	8	8	0	36
9	117700000	122500000	7	7	0	98
9	122500000	125800000	8	8	0	27
9	125800000	130300000	8	7	0	51
9	130300000	133500000	7	6	0	38
9	133500000	134000000	7	7	0	33
9	134000000	135900000	11	10	0	32
9	135900000	137400000	11	10	0	45
9	137400000	141213431	11	11	0	317
10	0	3000000	10	10	0	162
10	3000000	3800000	11	10	0	32
10	3800000	6600000	12	11	0	35
10	6600000	12200000	8	7	0	45
10	12200000	17300000	7	7	0	27
10	17300000	18600000	6	6	0	23
10	18600000	18700000	7	7	0	21
10	18700000	22600000	7	7	0	76
10	22600000	24600000	8	7	0	33
10	24600000	29600000	7	7	0	217
10	29600000	31300000	8	7	0	26
10	31300000	34400000	8	7	0	26
10	34400000	38000000	7	7	0	37
10	38000000	40200000	0	3	0	790
10	40200000	42300000	0	0	0	0
10	42300000	46100000	7	28	0	49872
10	46100000	49900000	7	7	0	45
10	49900000	52900000	9	9	0	32
10	52900000	61200000	10	9	0	39
10	61200000	64500000	11	10	0	32
10	64500000	70600000	10	10	0	34
10	70600000	74900000	11	10	0	35
10	74900000	77700000	11	10	0	37
10	77700000	82000000	11	10	0	48
10	82000000	87900000	10	10	0	68
10	87900000	89500000	11	11	0	36
10	89500000	92900000	11	11	0	36
10	92900000	94100000	15	14	0	68
10	94100000	97000000	8	7	0	131
10	97000000	99300000	8	7	0	761
10	99300000	101900000	7	7	0	43
10	101900000	103000000	7	7	0	25
10	103000000	104900000	7	7	0	351
10	104900000	105800000	7	7	0	26
10	105800000	111900000	7	7	0	42
10	111900000	114900000	8	7	0	31
10	114900000	119100000	7	7	0	49
10	119100000	121700000	7	7	0	41
10	121700000	123100000	7	7	0	25
10	123100000	127500000	7	7	0	47
10	127500000	130600000	7	7	0	149
10	130600000	135534747	6	6	0	1334
11	0	2800000	5	5	0	225
11	2800000	10700000	7	7	0	5417
11	10700000	12700000	8	7	0	32
11	12700000	16200000	9	8	0	57
11	16200000	21700000	11	10	0	31
11	21700000	26100000	10	10	0	49
11	26100000	27200000	11	10	0	29
11	27200000	31000000	11	10	0	37
11	31000000	36400000	12	11	0	112
11	36400000	43500000	10	10	0	48
11	43500000	48800000	11	11	0	65
11	48800000	51600000	8	11	0	24902
11	51600000	53700000	0	0	0	0
11	53700000	55700000	0	4	0	662
11	55700000	59900000	11	11	0	32
11	59900000	61700000	10	10	0	34
11	61700000	63400000	11	11	0	327
11	63400000	65900000	10	9	0	32
11	65900000	68400000	11	11	0	40
11	68400000	70400000	13	12	0	42
11	70400000	75200000	14	14	0	722
11	75200000	77100000	14	14	0	52
11	77100000	85600000	14	13	0	524
11	85600000	88300000	14	13	0	40
11	88300000	92800000	13	12	0	56
11	92800000	97200000	11	10	0	200
11	97200000	102100000	10	10	0	33
11	102100000	102900000	12	12	0	111
11	102900000	110400000	8	8	0	35
11	110400000	112500000	12	11	0	33
11	112500000	114500000	11	10	0	42
11	114500000	121200000	11	10	0	43
11	121200000	123900000	11	10	0	112
11	123900000	127800000	10	10	0	30
11	127800000	130800000	11	11	0	53
11	130800000	135006516	10	10	0	48
12	0	3300000	7	7	0	298
12	3300000	5400000	7	7	0	26
12	5400000	10100000	7	7	0	41
12	10100000	12800000	8	7	0	32
12	12800000	14800000	8	7	0	26
12	14800000	20000000	7	7	0	30
12	20000000	21300000	7	6	0	755
12	21300000	26500000	7	7	0	37
12	26500000	27800000	8	7	0	42
12	27800000	30700000	7	7	0	27
12	30700000	33300000	7	7	0	26
12	33300000	35800000	4	4	0	901
12	35800000	38200000	0	1	0	376
12	38200000	46400000	7	7	0	2011
12	46400000	49100000	8	7	0	32
12	49100000	51500000	7	7	0	27
12	51500000	54900000	8	8	0	43
12	54900000	56600000	10	10	0	32
12	56600000	58100000	11	10	0	33
12	58100000	63100000	10	10	0	47
12	63100000	65100000	11	10	0	32
12	65100000	67700000	11	10	0	494
12	67700000	71500000	11	10	0	41
12	71500000	75700000	10	9	0	32
12	75700000	80300000	10	10	0	38
12	80300000	86700000	9	9	0	34
12	86700000	89000000	10	9	0	33
12	89000000	92600000	11	10	0	39
12	92600000	96200000	11	11	0	35
12	96200000	101600000	11	10	0	32
12	101600000	103800000	11	10	0	31
12	103800000	109000000	11	11	0	119
12	109000000	111700000	11	10	0	36
12	111700000	112300000	11	10	0	34
12	112300000	114300000	12	11	0	35
12	114300000	116800000	13	13	0	64
12	116800000	118100000	11	11	0	32
12	118100000	120700000	11	11	0	33
12	120700000	125900000	7	7	0	41
12	125900000	129300000	7	7	0	380
12	129300000	133851895	6	6	0	114
13	0	4500000	0	0	0	0
13	4500000	10000000	0	0	0	0
13	10000000	16300000	0	0	0	0
13	16300000	17900000	0	0	0	0
13	17900000	19500000	0	2	0	52
13	19500000	23300000	8	7	0	68
13	23300000	25500000	10	10	0	35
13	25500000	27800000	11	11	0	37
13	27800000	28900000	11	11	0	147
13	28900000	32200000	11	11	0	35
13	32200000	34000000	12	11	0	41
13	34000000	35500000	12	11	0	35
13	35500000	40100000	10	9	0	136
13	40100000	45200000	9	9	0	61
13	45200000	45800000	10	9	0	27
13	45800000	47300000	11	11	0	72
13	47300000	50900000	13	13	0	38
13	50900000	55300000	13	12	0	43
13	55300000	59600000	7	7	0	47
13	59600000	62300000	7	6	0	23
13	62300000	65700000	6	6	0	51
13	65700000	68600000	6	6	0	27
13	68600000	73300000	6	6	0	27
13	73300000	75400000	8	7	0	32
13	75400000	77200000	7	7	0	25
13	77200000	79000000	7	7	0	28
13	79000000	87700000	7	6	0	41
13	87700000	90000000	6	6	0	22
13	90000000	95000000	7	7	0	30
13	95000000	98200000	13	12	0	38
13	98200000	99300000	13	12	0	35
13	99300000	101700000	13	12	0	36
13	101700000	104800000	7	7	0	26
13	104800000	107000000	7	7	0	38
13	107000000	110300000	7	7	0	4221
13	110300000	115169878	7	6	0	84
14	0	3700000	0	0	0	0
14	3700000	8100000	0	0	0	0
14	8100000	16100000	0	0	0	0
14	16100000	17600000	0	0	0	0
14	17600000	19100000	0	1	0	1335
14	19100000	24600000	11	10	0	61
14	24600000	33300000	9	9	0	98
14	33300000	35300000	10	10	0	28
14	35300000	36600000	10	10	0	38
14	36600000	37800000	10	9	0	40
14	37800000	43500000	9	9	0	48
14	43500000	47200000	9	8	0	31
14	47200000	50900000	14	13	0	92
14	50900000	54100000	16	15	0	41
14	54100000	55500000	16	16	0	51
14	55500000	58100000	16	15	0	84
14	58100000	62100000	15	15	0	40
14	62100000	64800000	15	15	0	40
14	64800000	67900000	11	11	0	38
14	67900000	70200000	8	7	0	33
14	70200000	73800000	8	8	0	26
14	73800000	79300000	8	8	0	27
14	79300000	83600000	8	7	0	37
14	83600000	84900000	7	7	0	25
14	84900000	89800000	8	7	0	189
14	89800000	91900000	8	8	0	85
14	91900000	94700000	8	8	0	27
14	94700000	96300000	8	8	0	27
14	96300000	101400000	8	8	0	26
14	101400000	103200000	8	8	0	28
14	103200000	104000000	8	8	0	28
14	104000000	107349540	7	7	0	144
15	0	3900000	0	0	0	0
15	3900000	8700000	0	0	0	0
15	8700000	15800000	0	0	0	0
15	15800000	19000000	0	0	0	0
15	19000000	20700000	0	8	0	246
15	20700000	25700000	11	11	0	73
15	25700000	28100000	10	10	0	112
15	28100000	30300000	10	10	0	61
15	30300000	31200000	11	10	0	50
15	31200000	33600000	11	11	0	47
15	33600000	40100000	11	11	0	35
15	40100000	42800000	12	11	0	35
15	42800000	43600000	12	12	0	30
15	43600000	44800000	12	12	0	38
15	44800000	49500000	10	10	0	36
15	49500000	52900000	11	11	0	39
15	52900000	59100000	17	16	0	47
15	59100000	59300000	19	18	0	48
15	59300000	63700000	17	16	0	54
15	63700000	67200000	11	11	0	41
15	67200000	67300000	9	8	0	23
15	67300000	67500000	8	8	0	29
15	67500000	72700000	8	8	0	29
15	72700000	75200000	8	7	0	32
15	75200000	76600000	10	10	0	36
15	76600000	78300000	11	11	0	203
15	78300000	81700000	12	11	0	34
15	81700000	85200000	11	11	0	54
15	85200000	89100000	15	15	0	51
15	89100000	94300000	15	15	0	74
15	94300000	98500000	15	14	0	41
15	98500000	102531392	15	14	0	73
16	0	7900000	6	6	0	94
16	7900000	10500000	7	7	0	26
16	10500000	12600000	7	7	0	30
16	12600000	14800000	7	7	0	369
16	14800000	16800000	9	9	0	36
16	16800000	21200000	11	11	0	39
16	21200000	24200000	12	12	0	51
16	24200000	28100000	11	11	0	33
16	28100000	34600000	11	11	0	3126
16	34600000	36600000	0	3	0	2425
16	36600000	38600000	0	0	0	0
16	38600000	47000000	0	6	0	6811
16	47000000	52600000	5	6	0	40
16	52600000	56700000	10	9	0	34
16	56700000	57400000	11	11	0	33
16	57400000	66700000	10	10	0	98
16	66700000	70800000	11	11	0	82
16	70800000	72900000	12	12	0	46
16	72900000	74100000	14	14	0	39
16	74100000	79200000	16	16	0	55
16	79200000	81700000	19	18	0	59
16	81700000	84200000	18	18	0	78
16	84200000	87100000	17	16	0	106
16	87100000	88700000	15	14	0	71
16	88700000	90354753	13	13	0	162
17	0	3300000	6	6	0	56
17	3300000	6500000	7	7	0	34
17	6500000	10700000	7	7	0	27
17	10700000	16000000	7	7	0	29
17	16000000	22200000	7	7	0	3365
17	22200000	24000000	0	5	0	26520
17	24000000	25800000	0	4	0	487
17	25800000	31800000	13	13	0	39
17	31800000	38100000	13	13	0	408
17	38100000	38400000	20	19	0	47
17	38400000	40900000	20	20	0	49
17	40900000	44900000	15	16	0	632
17	44900000	47400000	15	14	0	826
17	47400000	50200000	14	14	0	48
17	50200000	57600000	11	11	0	288
17	57600000	58300000	12	11	0	34
17	58300000	61100000	12	11	0	36
17	61100000	62600000	12	11	0	34
17	62600000	64200000	12	12	0	81
17	64200000	67100000	12	11	0	53
17	67100000	70900000	12	11	0	42
17	70900000	74800000	7	7	0	31
17	74800000	75300000	7	7	0	68
17	75300000	81195210	6	6	0	54
18	0	2900000	15	16	0	5983
18	2900000	7100000	15	14	0	103
18	7100000	8500000	15	14	0	39
18	8500000	10900000	16	15	0	46
18	10900000	15400000	12	12	0	106
18	15400000	17200000	0	0	0	89
18	17200000	19000000	0	8	0	46017
18	19000000	25000000	6	7	0	49
18	25000000	32700000	4	4	0	29
18	32700000	37200000	4	3	0	20
18	37200000	43500000	4	3	0	26
18	43500000	48200000	4	4	0	665
18	48200000	53800000	4	3	0	35
18	53800000	56200000	4	4	0	45
18	56200000	59000000	4	4	0	17
18	59000000	61600000	4	4	0	18
18	61600000	66800000	4	3	0	30
18	66800000	68700000	4	4	0	19
18	68700000	73100000	4	3	0	51
18	73100000	78077248	4	3	0	130
19	0	6900000	5	5	0	117
19	6900000	13900000	6	6	0	190
19	13900000	14000000	6	5	0	21
19	14000000	16300000	8	8	0	71
19	16300000	20000000	9	9	0	35
19	20000000	24400000	10	10	0	48
19	24400000	26500000	0	1	0	271
19	26500000	28600000	0	14	0	70344
19	28600000	32400000	10	10	0	41
19	32400000	35500000	11	10	0	122
19	35500000	38300000	10	9	0	245
19	38300000	38700000	10	10	0	33
19	38700000	43400000	10	10	0	43
19	43400000	45200000	11	11	0	250
19	45200000	48000000	10	9	0	35
19	48000000	51400000	8	8	0	180
19	51400000	53600000	8	8	0	34
19	53600000	56300000	8	8	0	56
19	56300000	59128983	8	8	0	100
20	0	5100000	8	7	0	33
20	5100000	9200000	4	5	0	35
20	9200000	12100000	4	3	0	18
20	12100000	17900000	4	3	0	21
20	17900000	21300000	4	3	0	43
20	21300000	22300000	3	3	0	24
20	22300000	25600000	4	3	0	43
20	25600000	27500000	0	2	0	665
20	27500000	29400000	0	0	0	0
20	29400000	32100000	11	11	0	824
20	32100000	34400000	11	11	0	34
20	34400000	37600000	11	11	0	37
20	37600000	41700000	11	11	0	40
20	41700000	42100000	12	11	0	31
20	42100000	46400000	12	11	0	83
20	46400000	49800000	11	11	0	170
20	49800000	55000000	13	13	0	111
20	55000000	56500000	15	14	0	40
20	56500000	58400000	15	14	0	41
20	58400000	63025520	12	12	0	128
21	0	2800000	0	0	0	0
21	2800000	6800000	0	0	0	0
21	6800000	10900000	0	7	0	2678
21	10900000	13200000	0	4	0	426
21	13200000	14300000	0	0	0	0
21	14300000	16400000	7	7	0	4180
21	16400000	24000000	7	7	0	28
21	24000000	26800000	7	7	0	25
21	26800000	31500000	8	7	0	39
21	31500000	35800000	8	8	0	63
21	35800000	37800000	8	8	0	26
21	37800000	39700000	8	8	0	30
21	39700000	42600000	8	8	0	127
21	42600000	48129895	7	7	0	71
22	0	3800000	0	0	0	0
22	3800000	8300000	0	0	0	0
22	8300000	12200000	0	0	0	0
22	12200000	14700000	0	0	0	0
22	14700000	17900000	4	6	0	508
22	17900000	22200000	9	9	0	1385
22	22200000	23500000	11	10	0	58
22	23500000	25900000	10	10	0	60
22	25900000	29600000	11	11	0	138
22	29600000	32200000	9	9	0	36
22	32200000	37600000	7	7	0	69
22	37600000	41000000	7	6	0	283
22	41000000	44200000	7	6	0	27
22	44200000	48400000	7	6	0	41
22	48400000	49400000	6	5	0	21
22	49400000	51304566	6	5	0	116
X	0	4300000	3	3	0	81
X	4300000	6000000	3	3	0	47
X	6000000	9500000	4	3	0	73
X	9500000	17100000	4	3	0	26
X	17100000	19300000	4	3	0	19
X	19300000	21900000	4	3	0	16
X	21900000	24900000	4	3	0	22
X	24900000	29300000	3	3	0	43
X	29300000	31500000	3	3	0	20
X	31500000	37600000	3	3	0	19
X	37600000	42400000	4	3	0	22
X	42400000	46400000	4	3	0	25
X	46400000	49800000	3	3	0	33
X	49800000	54800000	3	3	0	33
X	54800000	58100000	3	3	0	504
X	58100000	60600000	0	0	0	746
X	60600000	63000000	1	3	0	10121
X	63000000	64600000	3	3	0	20
X	64600000	67800000	3	3	0	48
X	67800000	71800000	4	3	0	23
X	71800000	73900000	3	3	0	29
X	73900000	76000000	3	3	0	28
X	76000000	84600000	3	3	0	69
X	84600000	86200000	3	3	0	59
X	86200000	91800000	3	3	0	24
X	91800000	93500000	3	3	0	22
X	93500000	98300000	3	3	0	20
X	98300000	102600000	3	3	0	41
X	102600000	103700000	4	3	0	23
X	103700000	108700000	4	3	0	375
X	108700000	116500000	3	3	0	75
X	116500000	120900000	3	3	0	24
X	120900000	128700000	3	3	0	3112
X	128700000	130400000	4	3	0	77
X	130400000	133600000	4	3	0	190
X	133600000	138000000	4	4	0	352
X	138000000	140300000	6	6	0	27
X	140300000	142100000	5	5	0	55
X	142100000	147100000	3	3	0	26
X	147100000	155270560	3	3	0	293
Y	0	2500000	0	0	0	0
Y	2500000	3000000	0	0	0	11
Y	3000000	11600000	0	0	0	844
Y	11600000	12500000	0	0	0	0
Y	12500000	13400000	0	2	0	360
Y	13400000	15100000	0	6	0	27532
Y	15100000	19800000	0	0	0	31
Y	19800000	22100000	0	0	0	18
Y	22100000	26200000	0	0	0	19
Y	26200000	28800000	0	0	0	27
Y	28800000	59373566	0	0	0	1259
