# Supplementary material for: Comprehensive Genomic Analysis of a BRCA2 Deficient Human Pancreatic Cancer
Source: PLoS One. 2011 Jul 5;6(7):e21639. doi: 10.1371/journal.pone.0021639 (PMC3130048; doi:10.1371/journal.pone.0021639)
Supplement: Table S2 — Coverage variation in Capan-1 exome capture. Median, mean and standard deviation values of the depth and coverage were calculated for the rbaited region for each chromosome and for the whole exome baited regions set. (XLS) [file pone.0021639.s002.xls]

## Sheet: Sheet1
Table S2: Coverage variation in Capan-1 exome capture.
CAPAN1_WEC
Depth in baited regions
chr	median	mean	std
1	97	146.375	174.6
2	123	163.958	160.247
3	118	162.886	154.546
4	109	130.661	105.936
5	114	168.525	176.646
6	87	118.297	153.165
7	124	202.247	251.894
8	113	157.314	156.935
9	85	128.544	140.827
10	101	135.208	127.14
11	91	137.065	145.488
12	95	126.64	115.464
13	144	175.159	140.262
14	106	150.777	149.73
15	127	180.915	184.266
16	63	113.729	145.151
17	76	138.773	195.632
18	75	117.64	130.222
19	43	88.9874	126.012
20	64	108.039	125.255
21	80	108.761	105.498
22	43	76.0922	94.4715
X	48	69.5963	83.1758
Y	0	2.30779	11.8532
ALL	89	136.361	157.906
Coverage in baited regions
chr	length	bases	coverage
1	4088750	4043031	0.988818
2	2548381	2521893	0.989606
3	2167878	2151127	0.992273
4	1442064	1422923	0.986727
5	1718973	1699229	0.988514
7	1631691	1614961	0.989747
6	2011588	1989981	0.989259
8	1185028	1171442	0.988535
9	1564952	1518527	0.970335
10	1580989	1559996	0.986722
11	2118653	2093921	0.988327
13	715658	702970	0.982271
12	1981662	1961561	0.989856
14	1185351	1173711	0.99018
15	1248450	1235333	0.989493
16	1583616	1560622	0.98548
17	2179449	2152099	0.987451
18	574099	566175	0.986198
19	2278274	2233528	0.98036
21	418262	411870	0.984718
20	1011388	995698	0.984487
22	779945	765910	0.982005
X	1537238	1514128	0.984967
Y	77264	8109	0.104952
ALL	37629603	37068745	0.985095
coverage	0.985095
