# Supplementary material for: Comprehensive Genomic Analysis of a BRCA2 Deficient Human Pancreatic Cancer
Source: PLoS One. 2011 Jul 5;6(7):e21639. doi: 10.1371/journal.pone.0021639 (PMC3130048; doi:10.1371/journal.pone.0021639)
Supplement: Table S5 — Coverage variation in HapMap exome capture. Sequence coverage from a WEC analysis in four HapMap samples is shown. (XLS) [file pone.0021639.s005.xls]

## Sheet: Sheet1
Table S5: Coverage variation in HapMap exome capture.
		NA11881_WEC					NA12761_WEC					NA12813_WEC					NA12892_WEC
Total reads		110702359					92686218					88180487					93759547
Mate paired reads		90208688	0.8149				76072812	0.8208				71198138	0.8074				76403266	0.8149
Mate maps to diff chr		1026147	0.00926942				1088829	0.0117475				760042	0.00861916				949150	0.0101232
Orphan reads		2100594	0.019				1590395	0.0172				1815103	0.0206				1850597	0.0197
Reads on baited regions		63823611	0.576533				46716550	0.504029				51179159	0.580391				52294563	0.557752
Median depth		79					59					63					68
Coverage		36851842	0.979331				36568129	0.971792				36373628	0.966623				36645920	0.973859
Genome length		37629603					37629603					37629603					37629603
	NA11881					NA12761					NA12813					NA12892
	chr	median	mean	std		chr	median	mean	std		chr	median	mean	std		chr	median	mean	std
	1	83	114.233	140.276		1	60	82.1449	99.225		1	64	87.3251	94.46		1	70	91.8894	100.471
	2	98	119.032	102.605		2	72	85.8759	73.4526		2	80	97.7246	91.7931		2	80	94.3116	78.5168
	3	88	108.401	88.6628		3	64	77.6413	62.7531		3	68	85.4299	72.4662		3	73	86.0314	66.1693
	4	113	128.876	93.0455		4	83	93.3433	65.3901		4	94	105.811	75.7806		4	89	98.9663	67.5409
	5	98	116.423	91.9796		5	72	84.5909	67.2404		5	80	94.2817	77.2031		5	80	92.1971	70.3239
	6	95	117.729	116.752		6	68	83.0391	76.671		6	74	93.1953	107.336		6	77	94.3739	105.01
	7	84	110.604	106.903		7	62	78.9573	73.392		7	66	86.5547	82.8046		7	70	88.8657	86.1165
	8	87	105.572	91.26		8	64	76.0926	64.9371		8	69	85.2721	76.4827		8	71	83.0026	68.769
	9	77	105.065	106.435		9	56	75.7372	77.0984		9	58	82.7592	90.6746		9	65	87.2514	90.7277
	10	95	113.423	92.1783		10	69	81.8398	65.5515		10	75	91.4	77.186		10	77	90.0969	69.2126
	11	74	99.1616	93.582		11	53	70.3554	65.982		11	55	75.7642	73.7632		11	63	80.4394	72.922
	12	88	107.49	86.6049		12	64	76.7137	61.2832		12	68	84.6771	71.0083		12	73	85.8623	65.7365
	13	112	125.679	87.2363		13	82	91.4288	61.74		13	93	103.377	71.9828		13	88	97.857	64.8055
	14	87	107.376	90.4451		14	63	77.2644	64.7021		14	69	84.6138	71.0501		14	72	85.22	66.7143
	15	89	112.119	97.4816		15	64	79.8898	68.8909		15	69	87.9615	77.0654		15	73	89.6218	74.1209
	16	54	81.7416	91.418		16	38	57.3953	63.4014		16	37	60.6631	71.2088		16	47	67.3543	72.3455
	17	65	94.7463	111.421		17	46	66.7723	75.202		17	47	71.6526	87.4603		17	56	77.8943	86.0246
	18	105	121.051	91.0426		18	77	87.8446	64.3906		18	85	97.7472	74.7168		18	84	94.6768	67.5059
	19	41	72.9341	89.9294		19	28	51.6514	65.1662		19	28	55.2643	72.5538		19	36	60.9597	72.6551
	20	58	80.9808	78.3521		20	42	57.7963	55.7055		20	41	61.0208	62.2851		20	50	66.7306	61.5698
	21	77	98.7702	89.1272		21	56	69.9869	61.9315		21	60	78.2211	73.0547		21	65	78.6545	66.1974
	22	44	68.4153	73.9336		22	32	48.7811	53.918		22	30	49.547	55.8986		22	39	58.0749	61.0231
	X	52	68.7036	74.9645		X	74	95.3737	99.5354		X	76	100.095	111.792		X	81	102.794	97.8971
	Y	111	149.81	129.611		Y	0	2.65286	13.621		Y	0	2.59432	13.6738		Y	0	2.68565	13.5031
	ALL	79	103.629	102.748		ALL	59	75.8295	74.2424		ALL	63	82.9204	83.955		ALL	68	84.9381	80.6895
	chr	length	bases	coverage		chr	length	bases	coverage		chr	length	bases	coverage		chr	length	bases	coverage
	1	4088750	4011947	0.981216		2	2548381	2494562	0.978881		1	4088750	3974966	0.972171		1	4088750	3999736	0.97823
	2	2548381	2504701	0.98286		1	4088750	3990875	0.976062		2	2548381	2485524	0.975335		2	2548381	2498923	0.980592
	3	2167878	2138444	0.986423		3	2167878	2132746	0.983794		3	2167878	2123938	0.979731		3	2167878	2134329	0.984524
	4	1442064	1418873	0.983918		4	1442064	1415311	0.981448		4	1442064	1408675	0.976846		4	1442064	1414963	0.981207
	5	1718973	1688550	0.982302		5	1718973	1684888	0.980171		5	1718973	1677590	0.975926		5	1718973	1685343	0.980436
	6	2011588	1983223	0.985899		7	1631691	1585783	0.971865		7	1631691	1579224	0.967845		7	1631691	1591313	0.975254
	7	1631691	1597399	0.978984		6	2011588	1975856	0.982237		6	2011588	1968925	0.978791		6	2011588	1976135	0.982376
	8	1185028	1158508	0.977621		9	1564952	1518064	0.970039		8	1185028	1139871	0.961894		8	1185028	1151933	0.972072
	9	1564952	1528939	0.976988		8	1185028	1149690	0.97018		9	1564952	1510201	0.965014		9	1564952	1523507	0.973517
	10	1580989	1553656	0.982711		10	1580989	1545518	0.977564		10	1580989	1537092	0.972234		10	1580989	1546883	0.978427
	11	2118653	2072874	0.978392		11	2118653	2059173	0.971926		11	2118653	2048067	0.966684		11	2118653	2065371	0.974851
	12	1981662	1951504	0.984781		13	715658	694676	0.970682		13	715658	692042	0.967001		13	715658	696163	0.972759
	13	715658	697643	0.974827		12	1981662	1943762	0.980875		12	1981662	1938989	0.978466		12	1981662	1945813	0.98191
	14	1185351	1163839	0.981852		14	1185351	1157910	0.97685		14	1185351	1153026	0.97273		15	1248450	1222049	0.978853
	15	1248450	1226096	0.982095		15	1248450	1220702	0.977774		15	1248450	1215019	0.973222		14	1185351	1160722	0.979222
	16	1583616	1540789	0.972956		16	1583616	1523337	0.961936		16	1583616	1509889	0.953444		16	1583616	1528351	0.965102
	17	2179449	2132817	0.978604		17	2179449	2117947	0.971781		17	2179449	2105297	0.965977		17	2179449	2121690	0.973498
	18	574099	563711	0.981906		18	574099	561515	0.97808		18	574099	559570	0.974693		18	574099	562281	0.979415
	19	2278274	2188441	0.96057		19	2278274	2154788	0.945798		19	2278274	2127950	0.934018		19	2278274	2166735	0.951042
	20	1011388	979877	0.968844		21	418262	405616	0.969765		21	418262	404244	0.966485		21	418262	406789	0.97257
	21	418262	407874	0.975164		20	1011388	971586	0.960646		20	1011388	962613	0.951774		20	1011388	976082	0.965092
	22	779945	757836	0.971653		22	779945	747420	0.958298		22	779945	739996	0.94878		22	779945	752671	0.965031
	X	1537238	1507620	0.980733		X	1537238	1510094	0.982342		X	1537238	1505177	0.979144		X	1537238	1511974	0.983565
	Y	77264	76681	0.992454		Y	77264	6310	0.081668		Y	77264	5743	0.0743296		Y	77264	6164	0.0797784
	ALL	37629603	36851842	0.979331		ALL	37629603	36568129	0.971792		ALL	37629603	36373628	0.966623		ALL	37629603	36645920	0.973859
	coverage	0.979331				coverage	0.971792				coverage	0.966623				coverage	0.973859
