# Supplementary material for: Comprehensive Genomic Analysis of a BRCA2 Deficient Human Pancreatic Cancer
Source: PLoS One. 2011 Jul 5;6(7):e21639. doi: 10.1371/journal.pone.0021639 (PMC3130048; doi:10.1371/journal.pone.0021639)
Supplement: Table S6 — SNVs identified from exome resequencing of Capan-1. Whole set of variants identified in CAPAN1 WEC data after the filtering process. (XLS) [file pone.0021639.s006.xls]

## Sheet: Sheet1
Table S6: SNVs identified from exome resequencing of Capan-1.
chr	position	gene	ref	var	genotype	rate	depth	protein consequence	aa mutation
1	3322160	PRDM16	C	G	C/G	0.389831	59	SYNONYMOUS_CODING	S378S
1	3548911	WDR8	C	T	C/T	0.406504	123	SARA
1	6252946	RPL22	G	A	G/A	0.58209	67	WITHIN_NON_CODING_GENE
1	6324747	ACOT7	G	A	G/A	0.545455	22	SYNONYMOUS_CODING	T300T
1	7737720	CAMTA1	G	A	G/A	0.477987	159	SYNONYMOUS_CODING	S947S
1	8390781	SLC45A1	G	A	G/A	0.516129	31	NON_SYNONYMOUS_CODING	G410S
1	11718390	FBXO44	G	A	G/A	0.652174	69	NON_SYNONYMOUS_CODING	R111Q
1	16475189	EPHA2	G	A	G/A	0.511111	45	SYNONYMOUS_CODING	S169S
1	16748432	SPATA21	C	T	C/T	0.375	40	SYNONYMOUS_CODING	T249T
1	19166285	TAS1R2	G	T	G/T	0.529412	51	SYNONYMOUS_CODING	L776L
1	19166494	TAS1R2	G	A	G/A	0.424242	33	SARA
1	19403221	UBR4	C	T	C/T	0.530612	49	INTRONIC
1	21042129	KIF17	C	T	C/T	0.48	25	SARA
1	24201269	CNR2	G	A	G/A	0.375	40	NON_SYNONYMOUS_CODING	A280V
1	24666261	GRHL3	T	G	T/G	0.5	20	INTRONIC
1	24669464	GRHL3	C	T	C/T	0.5	20	SARA
1	24671406	GRHL3	C	A	C/A	0.62069	29	NON_SYNONYMOUS_CODING	P480H
1	25558970	SYF2	T	C	T/C	0.473684	76	5PRIME_UTR
1	26075787	MAN1C1	C	T	C/T	0.418605	43	SYNONYMOUS_CODING	I265I
1	28271804	SMPDL3B	C	T	C/T	0.479452	73	SYNONYMOUS_CODING	P41P
1	28891260	TRNAU1AP	T	C	T/C	0.486188	181	SYNONYMOUS_CODING	D108D
1	31465377	PUM1	T	G	T/G	0.511628	43	NON_SYNONYMOUS_CODING	M340L
1	32205729	BAI2	C	T	C/T	0.545455	55	SYNONYMOUS_CODING	K680K
1	32222023	BAI2	A	C	A/C	0.454545	22	SARA
1	33954805	ZSCAN20	C	T	C/T	0.5	44	INTRONIC
1	34238146	CSMD2	G	A	G/A	0.647436	156	WITHIN_NON_CODING_GENE
1	35658709	SFPQ	G	T	G/T	0.55	40	SARA
1	36552840	TEKT2	G	A	G/A	0.352518	139	SYNONYMOUS_CODING	T261T
1	39823032	MACF1	A	T	A/T	0.527638	199	SARA
1	40881930	SMAP2	C	G	C/G	0.571429	98	STOP_GAINED	S255*
1	43102987	CCDC30	C	T	C/T	0.609023	266	WITHIN_NON_CODING_GENE
1	45553933	ZSWIM5	T	C	T/C	0.3625	80	INTRONIC
1	46662456	POMGNT1	C	T	C/T	0.33871	62	NON_SYNONYMOUS_CODING	V101I
1	47280785	CYP4B1	G	A	G/A	0.328	250	SARA
1	47717386	STIL	G	A	G/A	0.320819	586	NON_SYNONYMOUS_CODING	L1096F
1	52246956	OSBPL9	C	T	C/T	0.396694	121	SARA
1	55089105	ACOT11	G	A	G/A	0.643154	241	INTRONIC
1	59004451	DAB1	T	G	T/G	0.327869	61	WITHIN_NON_CODING_GENE
1	65095158	CACHD1	G	C	G/C	0.597297	370	NON_SYNONYMOUS_CODING	R213P
1	89616013	GBP2	G	A	G/A	0.661538	195	SARA
1	92737180	GLMN	G	A	G/A	0.673469	147	SYNONYMOUS_CODING	F255F
1	94458823	ABCA4	C	T	C/T	0.625	152	SARA
1	94517254	ABCA4	C	G	C/G	0.639098	133	SPLICE_SITE	G863A
1	95538408	ALG14	A	C	A/C	0.333333	45	NON_SYNONYMOUS_CODING	V16G
1	100214259	FRRS1	A	G	A/G	0.648438	256	SYNONYMOUS_CODING	N22N
1	109351501	STXBP3	A	G	A/G	0.401869	107	3PRIME_UTR
1	117121967	IGSF3	A	G	A/G	0.665094	212	INTRONIC
1	144852435	PDE4DIP	G	A	G/A	0.345238	84	WITHIN_NON_CODING_GENE
1	148004625	NBPF14	C	A	C/A	0.489919	496	NON_SYNONYMOUS_CODING	V903L
1	148004758	NBPF14	A	C	C/C	1	74	SYNONYMOUS_CODING	P858P
1	150280621	MRPS21	T	G	T/G	0.676692	133	NON_SYNONYMOUS_CODING	L75V
1	152552197	LCE3C	G	A	G/A	0.631579	133	INTRONIC
1	154458531	SHE	G	A	G/A	0.328947	228	NON_SYNONYMOUS_CODING	H397Y
1	160390242	VANGL2	A	G	A/G	0.622642	106	NON_SYNONYMOUS_CODING	H281R
1	160523339	RP11	G	A	G/A	0.583333	120	WITHIN_NON_CODING_GENE
1	173800770	DARS2	T	C	T/C	0.382979	94	INTRONIC
1	179354516	C1orf125	G	T	G/T	0.591772	316	INTRONIC
1	180165440	QSOX1	A	C	A/C	0.366667	30	SYNONYMOUS_CODING	P504P
1	180914505	KIAA1614	C	T	C/T	0.548387	31	SYNONYMOUS_CODING	R1118R
1	186321242	TPR	C	T	C/T	0.472222	72	SPLICE_SITE	V779I
1	196303007	KCNT2	G	T	G/T	0.484375	64	NON_SYNONYMOUS_CODING	T656K
1	196967422	CFHR5	G	C	G/C	0.368932	103	NON_SYNONYMOUS_CODING	V379L
1	198677424	PTPRC	T	G	T/G	0.41573	89	INTRONIC
1	200944044	KIF21B	G	A	G/A	0.571429	28	WITHIN_NON_CODING_GENE
1	202715244	KDM5B	G	A	G/A	0.88172	93	INTRONIC
1	206781584	LGTN	A	T	A/T	0.54386	57	INTRONIC
1	207108000	PIGR	C	T	C/T	0.469565	115	SYNONYMOUS_CODING	S490S
1	214556810	PTPN14	C	T	C/T	0.483871	31	SYNONYMOUS_CODING	P796P
1	215847956	USH2A	C	A	A/A	1	108	NON_SYNONYMOUS_CODING	V4433L
1	216166415	USH2A	G	A	G/A	0.454545	44	NON_SYNONYMOUS_CODING	S2251L
1	226125169	LEFTY2	G	A	G/A	0.368852	122	NON_SYNONYMOUS_CODING	A324V
1	229623359	NUP133	G	A	G/A	0.35	60	SPLICE_SITE	S399F
1	230820789	COG2	C	G	C/G	0.649874	397	INTRONIC
1	231902850	DISC1	T	C	T/C	0.674556	169	INTRONIC
1	235505313	GGPS1	A	T	A/T	0.916667	96	INTRONIC
1	235658044	B3GALNT2	C	T	C/T	0.610849	424	SYNONYMOUS_CODING	V69V
1	235922671	LYST	T	G	T/G	0.62116	293	NON_SYNONYMOUS_CODING	E2161A
2	15519924	NBAS	C	T	C/T	0.483871	31	SARA
2	24400744	C2orf84	G	A	G/A	0.595819	287	INTRONIC
2	27552237	GTF3C2	A	T	A/T	0.661538	65	SARA
2	27670507	IFT172	G	A	G/A	0.469231	130	INTRONIC
2	37229453	HEATR5B	G	A	G/A	0.336163	589	SARA
2	44023106	DYNC2LI1	T	C	T/C	0.395939	197	INTRONIC
2	64109577	UGP2	C	T	C/T	0.628099	121	INTRONIC
2	71360060	MPHOSPH10	C	A	C/A	0.67619	105	NON_SYNONYMOUS_CODING	S41Y
2	71360399	MPHOSPH10	A	G	A/G	0.630996	271	NON_SYNONYMOUS_CODING	N154S
2	73651920	ALMS1	C	G	C/G	0.495114	307	SARA
2	73675227	ALMS1	T	C	C/C	1.53979	289	NON_SYNONYMOUS_CODING	S524P
2	88082880	RGPD2	G	A	G/A	0.410999	1382	SARA
2	109113532	GCC2	A	G	A/G	0.395455	440	SYNONYMOUS_CODING	E1583E
2	111721220	ACOXL	G	A	G/A	0.336806	288	SARA
2	112785932	MERTK	G	C	G/C	0.609756	82	SARA
2	120125752	DBI	C	A	A/A	1	39	SARA
2	131520235	FAM123C	G	A	A/A	1	56	NON_SYNONYMOUS_CODING	R197Q
2	131704219	ARHGEF4	C	T	C/T	0.985612	139	SYNONYMOUS_CODING	R1002R
2	131797689	ARHGEF4	A	G	G/G	1	39	NON_SYNONYMOUS_CODING	Q283R
2	141533646	LRP1B	A	T	T/T	1	247	INTRONIC
2	148701099	ORC4L	G	A	G/A	0.342105	38	INTRONIC
2	159035344	AC069146	A	T	T/T	1.52564	78	WITHIN_NON_CODING_GENE
2	166848367	SCN1A	C	T	C/T	0.887255	204	SYNONYMOUS_CODING	E1720E
2	179300979	AC009948	A	T	A/T	0.34058	276	WITHIN_NON_CODING_GENE
2	182403792	CERKL	A	T	A/T	0.96129	155	INTRONIC
2	183053786	PDE1A	C	T	T/T	1	25	SPLICE_SITE	G392E
2	199011529	PLCL1	C	A	C/A	0.579365	126	3PRIME_UTR
2	201478720	AOX1	A	C	A/C	0.679012	81	INTRONIC
2	206605223	NRP2	T	C	T/C	0.616279	172	INTRONIC
2	211469931	CPS1	T	C	T/C	0.679775	356	NON_SYNONYMOUS_CODING	C654R
2	211503856	CPS1	A	G	A/G	0.333333	63	INTRONIC
2	216211604	ATIC	A	G	A/G	0.656489	131	SYNONYMOUS_CODING	G481G
2	227895247	COL4A4	A	G	A/G	0.609375	128	SYNONYMOUS_CODING	G1295G
2	227966626	COL4A4	C	T	C/T	0.471698	53	INTRONIC
2	228110633	COL4A3	G	T	G/T	0.524272	103	INTRONIC
2	234299037	DGKD	G	T	G/T	0.448276	145	INTRONIC
2	234299038	DGKD	T	C	T/C	0.431507	146	INTRONIC
3	3084847	CNTN4	C	T	T/T	1	102	SARA
3	10119937	FANCD2	G	A	A/A	1	90	INTRONIC
3	37458758	C3orf35	A	C	A/C	0.607692	130	NON_SYNONYMOUS_CODING	M1L
3	38158122	DLEC1	G	A	G/A	0.347826	46	SARA
3	39133129	WDR48	A	G	A/G	0.335079	191	NON_SYNONYMOUS_CODING	K561R
3	46062974	XCR1	C	T	C/T	0.673077	52	NON_SYNONYMOUS_CODING	A156T
3	48451952	PLXNB1	A	C	A/C	0.425	40	NON_SYNONYMOUS_CODING	V1811G
3	52661351	PBRM1	G	A	G/A	0.638132	257	SARA
3	97499441	ARL6	T	C	T/C	0.370079	254	INTRONIC
3	97806080	OR5AC2	C	T	C/T	0.347889	687	SARA
3	108179219	MYH15	C	A	C/A	0.473684	57	INTRONIC
3	111887792	SLC9A10	C	A	C/A	0.487633	283	NON_SYNONYMOUS_CODING	A1057S
3	111898387	SLC9A10	A	G	A/G	0.474403	293	SYNONYMOUS_CODING	T970T
3	112358171	CCDC80	A	T	A/T	0.583333	72	SYNONYMOUS_CODING	G194G
3	113322002	SIDT1	C	T	C/T	0.522293	157	INTRONIC
3	118906821	UPK1B	C	T	C/T	0.439655	116	SPLICE_SITE	A10V
3	118909069	UPK1B	T	C	T/C	0.576159	151	INTRONIC
4	1165808	SPON2	G	A	A/A	1	13	SARA
4	1388622	CRIPAK	T	A	T/A	0.391304	23	NON_SYNONYMOUS_CODING	L108H
4	2321925	ZFYVE28	G	A	A/A	1	37	NON_SYNONYMOUS_CODING	P259S
4	4190723	OTOP1	A	C	A/C	0.530612	98	SARA
4	5630349	EVC2	C	T	T/T	1	24	WITHIN_NON_CODING_GENE
4	15964357	FGFBP2	G	A	G/A	0.45614	57	SYNONYMOUS_CODING	S132S
4	22425877	GPR125	A	G	A/G	0.483333	120	SYNONYMOUS_CODING	I389I
4	25673391	SLC34A2	G	A	G/A	0.49789	237	INTRONIC
4	40122453	N4BP2	C	T	C/T	0.46	100	NON_SYNONYMOUS_CODING	P908S
4	48605328	FRYL	G	A	G/A	0.431507	146	5PRIME_UTR
4	68925193	AC096727	C	A	C/A	0.385417	96	SARA
4	69964234	UGT2B11	C	T	T/T	1.18182	143	INTRONIC
4	70146804	UGT2B28	G	C	C/C	1	85	NON_SYNONYMOUS_CODING	V196L
4	72620788	GC	C	T	C/T	0.524194	124	SARA
4	74005598	ANKRD17	A	G	A/G	0.450216	231	NON_SYNONYMOUS_CODING	L718P
4	76785641	PPEF2	G	A	G/A	0.50566	265	SARA
4	82013525	PRKG2	T	C	T/C	0.474227	97	INTRONIC
4	83827665	THAP9	C	G	C/G	0.482143	168	SYNONYMOUS_CODING	S155S
4	84342696	HELQ	C	T	C/T	0.469136	81	INTRONIC
4	87028329	MAPK10	A	G	A/G	0.469697	66	INTRONIC
4	88047318	AFF1	T	C	T/C	0.344828	29	NON_SYNONYMOUS_CODING	S881P
4	88578181	DMP1	T	G	T/G	0.518248	137	INTRONIC
4	101108877	DDIT4L	T	C	T/C	0.41791	67	NON_SYNONYMOUS_CODING	K180R
4	103826788	AC018797	T	G	T/G	0.444126	349	SYNONYMOUS_CODING	L405L
4	109769942	COL25A1	T	C	T/C	0.55042	238	WITHIN_NON_CODING_GENE
4	113347609	ALPK1	C	T	C/T	0.349206	63	INTRONIC
4	119950975	SYNPO2	A	T	A/T	0.611111	36	INTRONIC
4	120214159	USP53	C	T	C/T	0.498195	277	SYNONYMOUS_CODING	N1005N
4	145629449	HHIP	C	T	C/T	0.982456	57	SYNONYMOUS_CODING	L429L
4	148582193	PRMT10	G	T	T/T	1	77	INTRONIC
4	151170827	DCLK2	C	T	T/T	1	99	SYNONYMOUS_CODING	S687S
4	152024138	RPS3A	A	C	A/C	0.323529	136	NON_SYNONYMOUS_CODING	Q157P
4	172735851	GALNTL6	G	A	A/A	1	52	SYNONYMOUS_CODING	A40A
4	187093066	FAM149A	A	T	A/T	0.991304	115	INTRONIC
5	881253	BRD9	G	A	G/A	0.56	50	3PRIME_UTR
5	1034875	NKD2	T	A	T/A	0.578947	133	SARA
5	6746550	POLS	C	G	C/G	0.587302	63	INTRONIC
5	23521284	PRDM9	A	T	A/T	0.502793	179	5PRIME_UTR
5	33649105	ADAMTS12	T	C	T/C	0.474359	156	SARA
5	34925312	BRIX1	C	T	C/T	0.487805	41	SARA
5	35867549	IL7R	A	T	A/T	0.476596	235	SARA
5	38921864	OSMR	G	A	G/A	0.992337	261	NON_SYNONYMOUS_CODING	G578D
5	52365923	ITGA2	A	T	T/T	1.4359	39	INTRONIC
5	59899314	DEPDC1B	T	G	G/G	1	118	SARA
5	59940656	DEPDC1B	C	T	T/T	1	125	NON_SYNONYMOUS_CODING	V209I
5	63496582	RNF180	G	T	T/T	1	58	INTRONIC
5	63802636	RGS7BP	C	T	C/T	0.333333	39	SARA
5	76732249	WDR41	G	A	G/A	0.992188	128	INTRONIC
5	95242379	ELL2	T	C	C/C	1	114	NON_SYNONYMOUS_CODING	S197G
5	140563593	PCDHB16	A	C	A/C	0.375	40	NON_SYNONYMOUS_CODING	T487P
5	145483845	PLAC8L1	C	T	T/T	1	221	SYNONYMOUS_CODING	R10R
5	147040532	JAKMIP2	C	T	T/T	1	316	SYNONYMOUS_CODING	S202S
5	147900486	HTR4	G	A	A/A	1	225	INTRONIC
5	149754519	TCOF1	G	A	A/A	1	48	INTRONIC
5	161178482	GLRXP3	C	T	T/T	1	252	NON_SYNONYMOUS_CODING	R98Q
5	168271672	SLIT3	C	A	A/A	1	135	INTRONIC
5	175535591	FAM153B	G	A	G/A	0.356627	415	INTRONIC
5	176306301	UNC5A	C	G	C/G	0.977778	45	INTRONIC
5	178557107	ADAMTS2	T	C	T/C	0.984615	65	INTRONIC
5	178585867	ADAMTS2	A	T	T/T	1	49	NON_SYNONYMOUS_CODING	I330N
5	180377066	BTNL8	A	G	G/G	1	148	NON_SYNONYMOUS_CODING	Y226C
6	29395180	OR5V1	A	G	A/G	0.527778	108	INTRONIC
6	29912234	HLA	C	G	C/G	0.439394	66	INTRONIC
6	30640601	DHX16	A	C	A/C	0.35	20	SYNONYMOUS_CODING	G6G
6	31659646	BAT5	C	A	C/A	0.464286	28	SARA
6	32150086	RNF5	C	G	C/G	0.568627	51	SARA
6	32150356	RNF5	A	T	A/T	0.377358	53	INTRONIC
6	32487130	HLA	G	A	G/A	0.333333	33	INTRONIC
6	32629809	HLA	C	T	C/T	0.371429	35	WITHIN_NON_CODING_GENE
6	32948385	BRD2	G	A	G/A	0.484663	163	SARA
6	33408680	SYNGAP1	G	A	G/A	0.557143	70	SYNONYMOUS_CODING	E602E
6	41129207	TREM2	C	T	C/T	0.347826	23	NON_SYNONYMOUS_CODING	R62H
6	43488802	POLR1C	T	C	T/C	0.562963	135	INTRONIC
6	43970658	RP5	T	A	T/A	0.416667	24	SARA
6	45882038	CLIC5	C	T	C/T	0.538462	65	SARA
6	46825850	GPR116	G	A	G/A	0.58	50	SARA
6	47252045	TNFRSF21	G	A	G/A	0.391705	217	SARA
6	74498283	CD109	A	G	G/G	1	120	SYNONYMOUS_CODING	S806S
6	83881781	PGM3	G	A	A/A	1	12	SARA
6	84765171	MRAP2	T	G	G/G	1	123	INTRONIC
6	89867992	PM20D2	A	G	G/G	1	34	INTRONIC
6	105300262	HACE1	C	G	C/G	0.93617	47	INTRONIC
6	111306353	BXDC1	T	A	A/A	1	245	INTRONIC
6	116325150	FRK	C	G	G/G	1	33	NON_SYNONYMOUS_CODING	G119A
6	117127744	GPRC6A	C	T	T/T	1	84	NON_SYNONYMOUS_CODING	C375Y
6	121624817	C6orf170	C	G	C/G	0.989796	98	SYNONYMOUS_CODING	P342P
6	128134440	THEMIS	A	G	G/G	1	224	NON_SYNONYMOUS_CODING	L370P
6	146275983	SHPRH	T	G	G/G	1	161	NON_SYNONYMOUS_CODING	D159A
6	146351277	GRM1	C	T	T/T	1	78	SYNONYMOUS_CODING	D208D
6	146678686	GRM1	C	A	A/A	1	177	STOP_GAINED	Y486*
6	150390118	ULBP3	C	T	T/T	1	22	NON_SYNONYMOUS_CODING	A29T
6	152629631	SYNE1	C	T	T/T	1	78	NON_SYNONYMOUS_CODING	R5780Q
6	152740681	SYNE1	T	A	A/A	1.05714	35	INTRONIC
6	165846658	PDE10A	T	C	C/C	1	90	INTRONIC
7	4795042	FOXK1	G	A	G/A	0.362903	124	INTRONIC
7	5334472	SLC29A4	C	T	C/T	0.666667	51	INTRONIC
7	6623017	ZDHHC4	T	C	T/C	0.430233	258	SARA
7	7514322	COL28A1	A	G	A/G	0.524691	162	INTRONIC
7	36320740	EEPD1	A	C	A/C	0.337209	86	NON_SYNONYMOUS_CODING	N316T
7	38476034	AMPH	A	G	A/G	0.580189	212	INTRONIC
7	66273850	RABGEF1	G	A	G/A	0.385542	83	INTRONIC
7	66413694	C7orf42	G	A	G/A	0.362832	113	SARA
7	77214846	PTPN12	C	T	C/T	0.424501	351	INTRONIC
7	77236639	PTPN12	C	T	C/T	0.422857	175	INTRONIC
7	86468772	GRM3	C	T	C/T	0.471014	138	INTRONIC
7	88962831	ZNF804B	G	C	G/C	0.454321	405	NON_SYNONYMOUS_CODING	D179H
7	88964227	ZNF804B	C	G	G/G	1	300	NON_SYNONYMOUS_CODING	P644R
7	92244637	CDK6	T	C	T/C	0.509804	51	INTRONIC
7	94940880	PON1	A	C	A/C	0.603004	466	NON_SYNONYMOUS_CODING	M127R
7	102114116	POLR2J	T	C	T/C	0.395349	43	NON_SYNONYMOUS_CODING	K112E
7	106520052	PIK3CG	C	G	C/G	0.423077	156	NON_SYNONYMOUS_CODING	T827R
7	128482305	FLNC	C	T	C/T	0.636364	33	SYNONYMOUS_CODING	I714I
7	128489386	FLNC	T	G	T/G	0.371429	35	SPLICE_SITE	G1651G
7	130007276	CPA5	C	T	C/T	0.34375	64	NON_SYNONYMOUS_CODING	P301L
7	131815315	PLXNA4	G	A	G/A	0.484848	132	NON_SYNONYMOUS_CODING	H1870Y
7	131832679	PLXNA4	C	A	C/A	0.484848	99	NON_SYNONYMOUS_CODING	R1615M
7	135418881	FAM180A	C	T	C/T	0.483871	31	INTRONIC
7	136699729	AC009264	C	T	C/T	0.409396	149	WITHIN_NON_CODING_GENE
7	138968953	UBN2	G	T	G/T	0.322314	121	NON_SYNONYMOUS_CODING	G1101V
7	141438936	SSBP1	G	C	G/C	0.470833	240	5PRIME_UTR
7	141439003	SSBP1	C	T	C/T	0.478764	259	INTRONIC
8	623696	ERICH1	G	A	G/A	0.962963	81	NON_SYNONYMOUS_CODING	T219I
8	1857432	ARHGEF10	G	A	A/A	1	51	INTRONIC
8	11188922	AMAC1L2	T	C	T/C	0.354369	206	NON_SYNONYMOUS_CODING	W103R
8	24773259	NEFM	G	T	G/T	0.542056	107	SARA
8	25290087	KCTD9	G	T	G/T	0.333333	192	SARA
8	27528464	SCARA3	G	A	G/A	0.634146	41	SARA
8	27986992	ELP3	G	A	G/A	0.666667	189	INTRONIC
8	42977699	AC113191	C	T	C/T	0.358209	67	SYNONYMOUS_CODING	C244C
8	49642357	AC026904	G	A	G/A	0.56872	211	SARA
8	59548110	NSMAF	G	A	G/A	0.387879	165	SARA
8	67364320	ADHFE1	C	T	C/T	0.445946	74	SYNONYMOUS_CODING	I289I
8	68995651	PREX2	T	G	T/G	0.515873	126	INTRONIC
8	70551111	SULF1	A	G	A/G	0.561224	98	INTRONIC
8	73849653	KCNB2	A	G	A/G	0.533333	45	NON_SYNONYMOUS_CODING	H688R
8	94746196	RBM12B	G	A	G/A	0.521739	46	NON_SYNONYMOUS_CODING	P815S
8	104412761	SLC25A32	C	T	C/T	0.441379	290	NON_SYNONYMOUS_CODING	G276S
8	104452333	DCAF13	A	G	A/G	0.342723	213	INTRONIC
8	110592092	AC079061	G	T	G/T	0.357143	56	NON_SYNONYMOUS_CODING	P221T
8	118147587	SLC30A8	G	A	G/A	0.454006	674	5PRIME_UTR
8	126044499	KIAA0196	C	T	C/T	0.419355	62	NON_SYNONYMOUS_CODING	V1107M
8	126194525	NSMCE2	C	T	C/T	0.5	74	INTRONIC
8	130762291	GSDMC	G	A	G/A	0.676768	99	SYNONYMOUS_CODING	N386N
9	4544598	SLC1A1	C	T	T/T	1	281	SARA
9	27548276	C9orf72	G	A	G/A	0.990826	109	SYNONYMOUS_CODING	F468F
9	33798052	PRSS3	C	T	C/T	0.352941	85	SARA
9	35061983	VCP	G	A	A/A	1	68	INTRONIC
9	41589488	RP11	C	T	C/T	0.600823	243	3PRIME_UTR
9	88650423	GOLM1	C	G	C/G	0.372222	180	NON_SYNONYMOUS_CODING	G292A
9	88881000	ISCA1	G	A	G/A	0.628906	256	SYNONYMOUS_CODING	N116N
9	96850196	PTPDC1	A	G	A/G	0.566265	83	INTRONIC
9	97200785	HIATL1	A	G	A/G	0.371269	536	NON_SYNONYMOUS_CODING	I124V
9	97522342	C9orf3	G	A	G/A	0.337736	530	NON_SYNONYMOUS_CODING	E93K
9	101540607	ANKS6	C	T	C/T	0.623377	77	NON_SYNONYMOUS_CODING	E189K
9	105766949	CYLC2	G	C	G/C	0.421053	57	INTRONIC
9	112705680	PALM2	G	A	G/A	0.622222	45	NON_SYNONYMOUS_CODING	R372H
9	115651982	SLC46A2	C	G	C/G	0.607143	56	WITHIN_NON_CODING_GENE
9	117848668	TNC	G	C	G/C	0.386598	194	NON_SYNONYMOUS_CODING	R448G
9	123550314	FBXW2	G	C	G/C	0.4	130	NON_SYNONYMOUS_CODING	Q75E
9	123858859	CEP110	G	A	G/A	0.509804	51	INTRONIC
9	127177641	PSMB7	A	C	A/C	0.346154	26	INTRONIC
9	130479180	TTC16	C	G	C/G	0.368421	38	NON_SYNONYMOUS_CODING	P25A
9	131193551	CERCAM	G	C	G/C	0.457143	35	NON_SYNONYMOUS_CODING	C313S
9	131469236	PKN3	G	A	G/A	0.526316	38	SYNONYMOUS_CODING	E195E
9	131482577	PKN3	T	G	T/G	0.333333	21	INTRONIC
9	135277000	TTF1	A	G	A/G	0.57	300	SYNONYMOUS_CODING	S403S
9	136596574	SARDH	C	A	C/A	0.570621	177	SYNONYMOUS_CODING	V181V
9	136726513	VAV2	C	T	C/T	0.634146	41	SYNONYMOUS_CODING	A121A
9	136907002	BRD3	C	T	C/T	0.580645	31	SYNONYMOUS_CODING	A429A
9	137653750	COL5A1	G	A	G/A	0.521127	71	INTRONIC
9	137687183	COL5A1	C	T	C/T	0.413043	46	INTRONIC
9	137688741	COL5A1	C	T	C/T	0.473373	169	SYNONYMOUS_CODING	G964G
9	138516181	GLT6D1	C	T	C/T	0.460227	176	STOP_GAINED	W198*
9	138662152	KCNT1	A	G	A/G	0.457143	35	NON_SYNONYMOUS_CODING	Q498R
9	138831521	UBAC1	C	T	C/T	0.494253	87	SPLICE_SITE	A321T
9	139111021	QSOX2	G	A	G/A	0.405797	138	INTRONIC
9	139694177	NCLP1	A	T	A/T	0.485714	35	WITHIN_NON_CODING_GENE
9	140346878	NELF	T	A	T/A	0.462541	307	NON_SYNONYMOUS_CODING	E189V
10	3824143	KLF6	C	T	C/T	0.613636	44	SARA
10	18064996	FAM23B	G	C	G/C	0.996753	308	INTRONIC
10	18280054	SLC39A12	C	T	C/T	0.625	72	INTRONIC
10	21097527	NEBL	T	C	T/C	0.995726	234	SYNONYMOUS_CODING	T891T
10	21823672	MLLT10	C	T	C/T	0.957143	70	SYNONYMOUS_CODING	G33G
10	70446274	TET1	A	C	A/C	0.325397	126	SARA
10	96971638	C10orf129	G	A	A/A	1	102	3PRIME_UTR
10	97983635	BLNK	C	A	C/A	0.964286	28	INTRONIC
10	100453733	HPSE2	T	A	T/A	0.571429	42	INTRONIC
10	100453735	HPSE2	C	A	C/A	0.487179	39	INTRONIC
10	101729028	DNMBP	A	C	A/C	0.979798	99	INTRONIC
10	101993134	RP11	G	C	G/C	0.441176	34	WITHIN_NON_CODING_GENE
10	102238799	WNT8B	T	C	T/C	0.95	100	INTRONIC
10	104572581	C10orf26	C	T	T/T	1	20	SYNONYMOUS_CODING	I195I
10	105331331	NEURL	A	C	A/C	0.35	20	NON_SYNONYMOUS_CODING	H134P
10	105932348	C10orf79	G	C	G/C	0.444444	27	INTRONIC
10	119029528	SLC18A2	C	A	A/A	1	67	INTRONIC
10	126683075	CTBP2	T	A	T/A	0.329412	85	NON_SYNONYMOUS_CODING	H248L
10	129902368	MKI67	T	A	A/A	1	185	NON_SYNONYMOUS_CODING	D2579V
10	134151131	LRRC27	G	T	T/T	1	96	SYNONYMOUS_CODING	P91P
11	320844	IFITM3	T	G	T/G	0.323529	34	SARA
11	2154797	IGF2	T	G	T/G	0.347826	23	SARA
11	7818184	OR5P2	G	C	G/C	0.428571	91	NON_SYNONYMOUS_CODING	F102L
11	10823899	EIF4G2	C	A	C/A	0.336957	276	SARA
11	17757677	KCNC1	A	C	A/C	0.391304	46	NON_SYNONYMOUS_CODING	H43P
11	31327244	DCDC1	G	C	G/C	0.659722	288	SARA
11	36511644	TRAF6	G	C	G/C	0.635762	151	NON_SYNONYMOUS_CODING	S438C
11	36615697	RAG2	C	T	C/T	0.673684	95	NON_SYNONYMOUS_CODING	V8I
11	44069748	ACCSL	G	C	G/C	0.664062	128	SYNONYMOUS_CODING	S54S
11	46897179	LRP4	C	T	C/T	0.336364	110	SYNONYMOUS_CODING	P1251P
11	46911956	LRP4	T	C	T/C	0.56	75	NON_SYNONYMOUS_CODING	H596R
11	46921066	LRP4	C	T	C/T	0.641791	67	SARA
11	55905078	OR8J3	C	T	C/T	0.642857	294	NON_SYNONYMOUS_CODING	M39I
11	56127932	OR8J1	T	C	T/C	0.33452	281	SYNONYMOUS_CODING	N70N
11	57373546	SERPING1	T	A	T/A	0.333333	72	NON_SYNONYMOUS_CODING	V250D
11	60310076	MS4A13	G	C	G/C	0.671642	67	3PRIME_UTR
11	63064887	SLC22A10	G	T	G/T	0.665877	422	SARA
11	64898357	SYVN1	G	C	G/C	0.92	100	INTRONIC
11	89028477	TYR	G	C	G/C	0.373134	134	NON_SYNONYMOUS_CODING	K511N
11	102391572	MMP7	G	C	G/C	0.338028	71	INTRONIC
11	108164183	ATM	A	C	A/C	0.41853	313	NON_SYNONYMOUS_CODING	R1585S
11	116629069	BUD13	T	C	T/C	0.382022	267	NON_SYNONYMOUS_CODING	N472S
11	117058187	SIDT2	G	A	G/A	0.333333	183	INTRONIC
11	119003843	HINFP	C	T	C/T	0.423664	262	SYNONYMOUS_CODING	D351D
11	119991348	TRIM29	G	A	G/A	0.333333	75	SYNONYMOUS_CODING	P487P
11	121425851	SORL1	C	T	C/T	0.383117	154	INTRONIC
11	124413340	OR8B12	A	C	A/C	0.530516	213	NON_SYNONYMOUS_CODING	C71G
11	124794712	HEPACAM	C	T	C/T	0.630631	111	SYNONYMOUS_CODING	Q113Q
11	134238518	GLB1L2	C	T	C/T	0.35567	194	INTRONIC
12	3782630	EFCAB4B	A	T	T/T	1	47	NON_SYNONYMOUS_CODING	L218Q
12	6933827	GPR162	T	G	T/G	0.35	20	INTRONIC
12	7637795	CD163	A	G	G/G	1	59	SYNONYMOUS_CODING	N925N
12	7942269	NANOG	A	G	A/G	0.433566	143	SARA
12	9070309	PHC1	C	A	C/A	0.659574	47	SARA
12	10321703	OLR1	C	T	T/T	1	83	NON_SYNONYMOUS_CODING	V50I
12	21679350	C12orf39	G	C	C/C	1	26	5PRIME_UTR
12	25398284	KRAS	C	A	A/A	1	67	NON_SYNONYMOUS_CODING	G12V
12	45566976	PLEKHA9	T	C	C/C	1	24	SYNONYMOUS_CODING	L391L
12	49745118	DNAJC22	G	T	T/T	1	76	NON_SYNONYMOUS_CODING	G287W
12	50367201	AQP6	A	C	A/C	0.4	25	WITHIN_NON_CODING_GENE
12	52387743	ACVR1B	C	T	T/T	1	30	SARA
12	56713595	PAN2	C	G	G/G	1	260	INTRONIC
12	71834037	TSPAN8	G	A	G/A	0.990476	105	INTRONIC
12	76448785	NAP1L1	C	G	G/G	1	87	INTRONIC
12	94794801	CCDC41	G	A	A/A	1	191	INTRONIC
12	100649967	DEPDC4	T	C	T/C	0.992424	264	SYNONYMOUS_CODING	Q246Q
12	104515108	NFYB	G	A	G/A	0.976744	43	INTRONIC
12	106633585	CKAP4	G	A	A/A	1	34	SYNONYMOUS_CODING	A300A
12	109967892	UBE3B	G	T	G/T	0.962025	158	INTRONIC
12	122677257	LRRC43	G	A	A/A	1	56	INTRONIC
12	122999827	RSRC2	T	C	C/C	1	93	INTRONIC
12	123900496	SNRNP35	G	C	C/C	1	29	INTRONIC
12	130647649	FZD10	C	A	A/A	1	39	NON_SYNONYMOUS_CODING	N54K
12	133237753	POLE	G	A	G/A	0.37037	27	INTRONIC
13	25458267	CENPJ	G	T	T/T	1.37037	81	INTRONIC
13	31227408	USPL1	T	G	G/G	1	322	NON_SYNONYMOUS_CODING	N454K
13	31526785	C13orf26	G	T	G/T	0.949153	177	INTRONIC
13	32745171	FRY	G	C	G/C	0.995037	403	SARA
13	41383851	SLC25A15	T	A	T/A	0.988506	87	3PRIME_UTR
13	52701490	NEK5	A	T	T/T	1.71304	115	WITHIN_NON_CODING_GENE
13	92345590	GPC5	C	A	C/A	0.994118	170	NON_SYNONYMOUS_CODING	P159T
13	96743584	HS6ST3	G	T	T/T	1	36	SYNONYMOUS_CODING	T156T
13	107211797	ARGLU1	C	T	T/T	1	103	NON_SYNONYMOUS_CODING	A186T
13	111090321	COL4A2	C	T	T/T	1	39	INTRONIC
14	20586294	OR4K17	T	A	T/A	0.394077	439	SARA
14	20665640	OR11G2	G	A	G/A	0.328358	67	NON_SYNONYMOUS_CODING	G49D
14	20873795	TEP1	A	G	A/G	0.535211	71	INTRONIC
14	20874411	TEP1	T	C	T/C	0.561404	114	NON_SYNONYMOUS_CODING	H239R
14	23816798	SLC22A17	C	A	C/A	0.533333	45	SARA
14	24975382	CMA1	C	T	C/T	0.610169	59	NON_SYNONYMOUS_CODING	R151K
14	44976176	FSCB	G	T	G/T	0.539474	380	SYNONYMOUS_CODING	S5S
14	45700409	C14orf106	C	T	C/T	0.393305	239	NON_SYNONYMOUS_CODING	R510Q
14	51204985	AL358334	T	C	T/C	0.452611	517	WITHIN_NON_CODING_GENE
14	53211627	STYX	A	G	A/G	0.507246	276	INTRONIC
14	55411152	WDHD1	A	G	A/G	0.455657	327	SYNONYMOUS_CODING	N1029N
14	58604730	C14orf37	T	C	T/C	0.490909	165	SYNONYMOUS_CODING	Q449Q
14	61789192	AL359220	G	A	G/A	0.589744	78	WITHIN_NON_CODING_GENE
14	63862009	PPP2R5E	A	G	A/G	0.446575	365	INTRONIC
14	64610614	SYNE2	T	G	T/G	0.377953	127	NON_SYNONYMOUS_CODING	L1529R
14	65259862	SPTB	C	T	C/T	0.418367	98	5PRIME_UTR
14	73563616	RBM25	G	A	A/A	1	30	INTRONIC
14	73730411	PAPLN	C	G	C/G	0.966667	30	NON_SYNONYMOUS_CODING	R928G
14	73735342	PAPLN	G	A	A/A	1	37	INTRONIC
14	74876126	TMEM90A	G	C	G/C	0.5	100	NON_SYNONYMOUS_CODING	P108A
14	77845379	C14orf174	T	A	T/A	0.995726	234	NON_SYNONYMOUS_CODING	F540I
14	92189557	CATSPERB	A	C	C/C	1	163	INTRONIC
14	94756286	SERPINA10	C	T	C/T	0.442177	147	SYNONYMOUS_CODING	G215G
15	40751710	BAHD1	A	C	A/C	0.322581	31	SARA
15	41066625	DNAJC17	C	G	C/G	0.65	60	NON_SYNONYMOUS_CODING	V204L
15	43028150	CDAN1	G	A	G/A	0.341463	41	INTRONIC
15	43378256	UBR1	C	T	C/T	0.615385	286	SYNONYMOUS_CODING	E88E
15	43818115	MAP1A	G	A	G/A	0.622222	135	NON_SYNONYMOUS_CODING	D1720N
15	44853186	EIF3J	G	T	G/T	0.602151	186	SARA
15	45695763	SPATA5L1	G	C	G/C	0.333333	60	INTRONIC
15	48429196	SLC24A5	C	T	C/T	0.580357	112	INTRONIC
15	65140760	PLEKHO2	C	A	C/A	0.354167	48	INTRONIC
15	66794352	RPL4	G	A	G/A	0.385542	83	INTRONIC
15	73428338	NEO1	A	G	A/G	0.455026	189	NON_SYNONYMOUS_CODING	I47V
15	74565181	CCDC33	G	A	G/A	0.530435	115	SYNONYMOUS_CODING	P439P
15	75981983	CSPG4	C	T	C/T	0.395349	43	NON_SYNONYMOUS_CODING	G475R
15	76175694	UBE2Q2	A	G	A/G	0.637363	182	INTRONIC
15	76222281	FBXO22	A	G	A/G	0.568783	378	NON_SYNONYMOUS_CODING	K229E
15	80445489	FAH	G	A	G/A	0.989011	91	INTRONIC
15	82443824	EFTUD1	C	T	C/T	0.614286	350	NON_SYNONYMOUS_CODING	A940T
15	85164013	ZSCAN2	A	C	A/C	0.446154	65	NON_SYNONYMOUS_CODING	H46P
15	89844664	FANCI	C	T	C/T	0.564334	443	SYNONYMOUS_CODING	S939S
15	94986135	MCTP2	G	C	G/C	0.482143	112	INTRONIC
15	100942961	LASS3	C	A	C/A	0.5311	209	NON_SYNONYMOUS_CODING	R370M
15	101552184	LRRK1	T	C	T/C	0.487603	121	INTRONIC
16	723506	RHOT2	C	T	T/T	1	60	NON_SYNONYMOUS_CODING	P586L
16	819434	MSLNL	C	T	C/T	0.945455	55	SYNONYMOUS_CODING	Q1052Q
16	830689	MSLNL	C	T	T/T	1	154	SYNONYMOUS_CODING	P104P
16	3490988	ZNF597	T	C	C/C	1	64	INTRONIC
16	3640461	BTBD12	G	A	A/A	1	32	NON_SYNONYMOUS_CODING	R1060W
16	7568191	A2BP1	C	T	C/T	0.967742	31	NON_SYNONYMOUS_CODING	P29S
16	15790736	NDE1	A	C	A/C	0.326087	46	INTRONIC
16	17451933	XYLT1	C	T	C/T	0.569892	93	INTRONIC
16	20824509	ERI2	C	T	C/T	0.641667	120	INTRONIC
16	21098323	DNAH3	C	G	C/G	0.630612	490	NON_SYNONYMOUS_CODING	R908S
16	58036349	C16orf57	T	A	T/A	0.583333	36	INTRONIC
16	61747748	CDH8	C	G	C/G	0.575758	99	NON_SYNONYMOUS_CODING	E551Q
16	67190564	TRADD	C	G	C/G	0.64	225	5PRIME_UTR
16	67916047	EDC4	C	G	C/G	0.632911	79	INTRONIC
16	67943288	PSKH1	G	A	G/A	0.409639	83	SYNONYMOUS_CODING	L212L
16	68379609	PRMT7	T	C	T/C	0.322581	31	NON_SYNONYMOUS_CODING	F320S
16	72992443	ATBF1	G	A	G/A	0.634361	227	SYNONYMOUS_CODING	P534P
16	88677650	ZC3H18	C	T	C/T	0.540881	159	INTRONIC
16	88925125	TRAPPC2L	C	T	C/T	0.357143	252	SYNONYMOUS_CODING	S44S
17	1248757	YWHAE	T	G	T/G	0.9967	303	NON_SYNONYMOUS_CODING	E251A
17	1675375	SERPINF1	C	T	T/T	1	69	INTRONIC
17	9791226	GLP2R	G	C	G/C	0.99177	243	INTRONIC
17	10357825	MYH4	C	T	T/T	1	45	SARA
17	12013719	MAP2K4	G	T	T/T	1	136	STOP_GAINED	E221*
17	15532371	TRIM16	A	C	A/C	0.411765	34	NON_SYNONYMOUS_CODING	V432G
17	15604485	ZNF286	T	C	T/C	0.478261	46	SYNONYMOUS_CODING	S19S
17	18659467	FBXW10	C	G	C/G	0.907407	54	SPLICE_SITE	T411R
17	26940607	AC005726	G	A	G/A	0.526316	190	WITHIN_NON_CODING_GENE
17	27024870	SUPT6H	G	A	G/A	0.484043	188	INTRONIC
17	27889748	ABHD15	C	T	C/T	0.507692	65	NON_SYNONYMOUS_CODING	R413Q
17	27898791	TP53I13	G	A	G/A	0.641026	78	SARA
17	28512039	CCDC55	G	A	G/A	0.512931	232	NON_SYNONYMOUS_CODING	D342N
17	29509641	NF1	G	A	G/A	0.391566	166	WITHIN_NON_CODING_GENE
17	29854861	RAB11FIP4	G	T	G/T	0.537313	67	SARA
17	33318746	LIG3	A	G	A/G	0.372973	185	SYNONYMOUS_CODING	P366P
17	33770840	SLFN13	T	A	T/A	0.431818	308	NON_SYNONYMOUS_CODING	H71L
17	33921106	AP2B1	C	A	C/A	0.541667	48	INTRONIC
17	34497919	TBC1D3B	A	G	A/G	0.607299	685	SYNONYMOUS_CODING	Y180Y
17	34538532	CCL3L1	G	T	T/T	1	306	INTRONIC
17	34585963	CCL3L1	A	G	A/G	0.569584	697	INTRONIC
17	34640098	TBC1D3C	G	T	G/T	0.9967	303	INTRONIC
17	34943624	GGNBP2	G	A	G/A	0.545866	883	SYNONYMOUS_CODING	T613T
17	36342590	TBC1D3	A	G	A/G	0.577291	731	SYNONYMOUS_CODING	Y180Y
17	36997503	C17orf98	T	C	T/C	0.538462	143	NON_SYNONYMOUS_CODING	Q47R
17	37360917	RPL19	C	T	C/T	0.491018	167	3PRIME_UTR
17	39525906	KRT33B	C	T	C/T	0.366071	112	NON_SYNONYMOUS_CODING	G33R
17	39553494	KRT31	A	G	A/G	0.574586	181	NON_SYNONYMOUS_CODING	C100R
17	44373433	LRRC37A	C	G	C/G	0.527027	1036	WITHIN_NON_CODING_GENE
17	44373462	LRRC37A	C	T	C/T	0.585427	796	WITHIN_NON_CODING_GENE
17	44373804	LRRC37A	C	G	C/G	0.677643	577	WITHIN_NON_CODING_GENE
17	44373844	LRRC37A	G	A	G/A	0.655	600	WITHIN_NON_CODING_GENE
17	44373886	LRRC37A	C	T	C/T	0.603883	515	WITHIN_NON_CODING_GENE
17	44374762	LRRC37A	A	G	A/G	0.451353	1367	WITHIN_NON_CODING_GENE
17	44591012	LRRC37A2	C	G	C/G	0.525763	1048	NON_SYNONYMOUS_CODING	P312A
17	44591041	LRRC37A2	C	T	C/T	0.567503	837	SYNONYMOUS_CODING	A321A
17	44591423	LRRC37A2	G	A	G/A	0.666667	603	NON_SYNONYMOUS_CODING	V449I
17	44591465	LRRC37A2	C	T	C/T	0.615087	517	NON_SYNONYMOUS_CODING	P463S
17	45468858	C17orf57	T	G	T/G	0.676056	142	STOP_GAINED	Y498*
17	55926589	MRPS23	C	G	G/G	1	20	INTRONIC
17	56056483	VEZF1	A	G	A/G	0.985915	213	INTRONIC
17	60023983	MED13	T	G	T/G	0.559585	193	INTRONIC
17	65353554	PSMD12	G	C	G/C	0.378378	111	INTRONIC
17	65907936	BPTF	T	C	T/C	0.629139	302	SYNONYMOUS_CODING	N1312N
17	65908269	BPTF	G	A	G/A	0.324582	419	SYNONYMOUS_CODING	L1423L
17	66933194	ABCA8	C	T	C/T	0.597222	216	NON_SYNONYMOUS_CODING	E122K
17	67257337	ABCA5	T	G	T/G	0.525862	116	NON_SYNONYMOUS_CODING	I1166L
17	72205447	AC100786	C	T	T/T	1	37	SPLICE_SITE	P62P
17	72239586	TTYH2	C	T	T/T	1	83	NON_SYNONYMOUS_CODING	R237C
17	72429906	GPRC5C	G	A	A/A	1	61	INTRONIC
17	73124920	ARMC7	G	A	A/A	1	41	SYNONYMOUS_CODING	P128P
17	73124925	ARMC7	G	A	G/A	0.95122	41	NON_SYNONYMOUS_CODING	R130H
17	73564638	LLGL2	C	T	T/T	1	21	NON_SYNONYMOUS_CODING	P373L
17	73570915	LLGL2	C	T	T/T	1	44	INTRONIC
17	74288596	QRICH2	G	A	A/A	1	101	NON_SYNONYMOUS_CODING	R572C
17	76354595	SOCS3	C	T	C/T	0.972222	36	SYNONYMOUS_CODING	R194R
18	7008469	LAMA1	C	T	C/T	0.586667	150	INTRONIC
18	7044893	LAMA1	T	C	T/C	0.492063	315	SARA
18	7050643	LAMA1	G	A	G/A	0.439024	123	SARA
18	8720313	KIAA0802	A	G	A/G	0.483271	269	INTRONIC
18	9208819	ANKRD12	T	C	T/C	0.472819	791	INTRONIC
18	9255471	ANKRD12	A	G	A/G	0.483221	149	NON_SYNONYMOUS_CODING	T713A
18	9359990	TWSG1	G	A	G/A	0.546392	97	SYNONYMOUS_CODING	P48P
18	12951878	SEH1L	G	A	G/A	0.35641	390	NON_SYNONYMOUS_CODING	D46N
18	13884981	MC2R	C	T	C/T	0.320442	181	SARA
18	19444661	MIB1	A	C	A/C	0.358127	363	3PRIME_UTR
18	30825215	C18orf34	C	T	T/T	1	118	SARA
18	43595852	PSTPIP2	A	T	A/T	0.888889	18	INTRONIC
18	43833701	C18orf25	T	G	T/G	0.883721	86	NON_SYNONYMOUS_CODING	S252A
18	47405425	MYO5B	T	G	G/G	1.71154	52	3PRIME_UTR
18	48591865	SMAD4	C	G	G/G	1	198	STOP_GAINED	S343*
18	50937010	DCC	C	A	A/A	1	50	NON_SYNONYMOUS_CODING	L1042M
18	50937022	DCC	A	C	C/C	1	35	INTRONIC
18	51053107	DCC	A	C	C/C	1	64	NON_SYNONYMOUS_CODING	K1411T
18	61465822	SERPINB7	A	T	A/T	0.964912	57	INTRONIC
19	621166	POLRMT	G	A	A/A	1	65	INTRONIC
19	7707175	STXBP2	G	C	G/C	0.394737	38	SARA
19	8161913	AC010336	G	T	T/T	1	70	INTRONIC
19	11687908	ACP5	G	A	G/A	0.993865	163	SYNONYMOUS_CODING	F75F
19	12060627	ZNF700	A	G	A/G	0.994186	172	SYNONYMOUS_CODING	Q596Q
19	17441093	ANO8	G	T	T/T	1	39	INTRONIC
19	17441909	ANO8	T	G	G/G	1	86	SYNONYMOUS_CODING	T273T
19	19607042	GATAD2A	C	T	C/T	0.362745	102	SARA
19	21493278	ZNF708	T	A	T/A	0.354167	48	INTRONIC
19	22364254	ZNF676	C	A	C/A	0.586319	307	NON_SYNONYMOUS_CODING	D89Y
19	23869886	ZNF675	C	T	C/T	0.359649	114	5PRIME_UTR
19	36896578	ZFP82	C	T	C/T	0.666667	81	INTRONIC
19	38896199	FAM98C	A	C	A/C	0.387931	116	NON_SYNONYMOUS_CODING	Y199S
19	39963621	SUPT5H	C	A	C/A	0.4	30	INTRONIC
19	40363916	FCGBP	C	T	C/T	0.4	35	NON_SYNONYMOUS_CODING	R4909H
19	40400791	FCGBP	A	G	A/G	0.972973	37	SYNONYMOUS_CODING	S1766S
19	41382560	CYP2A6	A	T	A/T	0.542169	83	INTRONIC
19	42824608	TMEM145	G	C	G/C	0.666667	72	INTRONIC
19	43097693	CEACAM8	G	T	G/T	0.623632	457	SPLICE_SITE	P142T
19	43575905	PSG1	C	T	C/T	0.657106	767	INTRONIC
19	43585111	PSG1	C	G	C/G	0.523932	1170	NON_SYNONYMOUS_CODING	G118R
19	43585428	PSG1	T	C	T/C	0.611285	319	INTRONIC
19	43709637	PSG1	C	G	C/G	0.5	88	NON_SYNONYMOUS_CODING	V18L
19	47764017	CCDC9	G	A	G/A	0.4	75	NON_SYNONYMOUS_CODING	R128H
19	47984058	KPTN	G	C	G/C	0.333333	60	SYNONYMOUS_CODING	P186P
19	48806993	CCDC114	A	C	A/C	0.4	35	NON_SYNONYMOUS_CODING	V57G
19	55255357	KIR2DL3	G	C	G/C	0.459119	636	NON_SYNONYMOUS_CODING	R162T
20	2293610	TGM3	G	A	G/A	0.462069	290	INTRONIC
20	4768378	RASSF2	G	A	A/A	1	65	WITHIN_NON_CODING_GENE
20	6100031	FERMT1	G	A	A/A	1	183	INTRONIC
20	18505674	SEC23B	C	T	T/T	1	24	INTRONIC
20	20079287	C20orf26	T	G	G/G	1	81	INTRONIC
20	31627297	BPIL3	G	A	G/A	0.363636	33	NON_SYNONYMOUS_CODING	A349T
20	31656695	C20orf185	G	A	G/A	0.588235	119	SARA
20	32217737	CBFA2T2	C	T	C/T	0.594595	37	INTRONIC
20	47770443	STAU1	C	A	C/A	0.663717	113	INTRONIC
20	49446813	BCAS4	C	T	C/T	0.602484	161	INTRONIC
21	14982746	POTED	G	A	G/A	0.427273	110	SARA
21	15537727	LIPI	A	G	A/G	0.481928	83	INTRONIC
21	30332987	RNF160	C	G	C/G	0.496296	135	3PRIME_UTR
21	31988796	KRTAP20	A	T	A/T	0.580645	124	INTRONIC
21	33839992	C21orf63	T	G	G/G	1	181	WITHIN_NON_CODING_GENE
21	34133365	C21orf66	C	T	C/T	0.513514	222	INTRONIC
21	40190443	ETS2	C	T	C/T	0.527473	91	SYNONYMOUS_CODING	S228S
21	40777931	WRB	C	T	C/T	0.375	56	3PRIME_UTR
21	40794933	WRB	G	T	G/T	0.460815	319	INTRONIC
21	42830514	MX1	G	A	G/A	0.484848	33	SYNONYMOUS_CODING	Q606Q
21	45993727	C21orf29	A	C	A/C	0.326087	46	INTRONIC
21	46311707	ITGB2	A	C	A/C	0.36	25	WITHIN_NON_CODING_GENE
21	47545809	COL6A2	C	T	C/T	0.391304	46	NON_SYNONYMOUS_CODING	L694F
21	47859993	PCNT	C	T	C/T	0.673913	46	INTRONIC
22	21098985	PI4KA	C	A	C/A	0.60119	168	SYNONYMOUS_CODING	P1071P
22	24107048	C22orf15	C	T	C/T	0.636364	66	WITHIN_NON_CODING_GENE
22	24313447	DDTL	C	T	C/T	0.363636	55	INTRONIC
22	27024405	CRYBA4	T	A	T/A	0.341085	129	INTRONIC
22	27026286	CRYBA4	G	A	G/A	0.607143	84	INTRONIC
22	31042833	MTMR3	C	A	C/A	0.328571	70	WITHIN_NON_CODING_GENE
22	41077548	MCHR1	C	T	C/T	0.977778	45	SYNONYMOUS_CODING	A295A
22	42043096	CSDC2	G	A	A/A	1	55	INTRONIC
22	42276741	SREBF2	G	A	G/A	0.978947	95	NON_SYNONYMOUS_CODING	G595S
22	47064086	GRAMD4	A	G	A/G	0.4	20	INTRONIC
X	1551173	ASMTL	G	A	A/A	1	14	SYNONYMOUS_CODING	S90S
X	2343343	DHRSX	A	G	G/G	1	47	SPLICE_SITE	F38L
X	2878497	ARSE	A	G	G/G	1	63	INTRONIC
X	23689749	PRDX4	C	T	T/T	1	75	SYNONYMOUS_CODING	F101F
X	39931792	BCOR	G	T	T/T	1	50	SARA
X	68725728	FAM155B	C	T	T/T	1	47	SYNONYMOUS_CODING	T201T
X	69460177	AWAT1	T	C	C/C	1	63	3PRIME_UTR
X	73962253	KIAA2022	C	T	T/T	1	113	SYNONYMOUS_CODING	E713E
X	107224318	TEX13B	C	T	T/T	1	39	NON_SYNONYMOUS_CODING	G311S
X	119760042	C1GALT1C1	T	C	C/C	1	133	3PRIME_UTR
X	122318455	GRIA3	T	A	A/A	1	34	STOP_GAINED	L23*
X	134994068	SAGE1	A	C	C/C	1	56	NON_SYNONYMOUS_CODING	D826A
X	135574389	BRS3	G	A	A/A	1	73	NON_SYNONYMOUS_CODING	R352Q
X	140336569	SPANXC	C	T	C/T	0.96144	389	NON_SYNONYMOUS_CODING	G8S
X	152226277	PNMA3	G	A	A/A	1	14	NON_SYNONYMOUS_CODING	V289M
