# Supplementary material for: Comprehensive Genomic Analysis of a BRCA2 Deficient Human Pancreatic Cancer
Source: PLoS One. 2011 Jul 5;6(7):e21639. doi: 10.1371/journal.pone.0021639 (PMC3130048; doi:10.1371/journal.pone.0021639)
Supplement: Table S8 — Indels indentified from exome resequencing of Capan-1. List of indel variants identified in CAPAN1 WEC data after filtering process. (XLS) [file pone.0021639.s008.xls]

## Sheet: final indel passing filter
Table S8: Indels indentified from exome resequencing of Capan-1.
chr	pos	gene	ref	var	genotype	indel	rate	depth	consequences	consequences	consequences	consequences	consequences	consequences	consequences	consequences	consequences
1	16727305	SPATA21	-	CTT	-/CTT	ins	0.47619	42	FRAMESHIFT_CODING	3PRIME_UTR	WITHIN_NON_CODING_GENE
1	23237041	EPHB2	C	-	C/-	del	0.512821	39	FRAMESHIFT_CODING
1	39823032	MACF1	-	T	-/T	ins	0.422111	199	INTRONIC	WITHIN_NON_CODING_GENE
1	70504692	LRRC7	-	A	-/A	ins	0.326087	92	FRAMESHIFT_CODING	3PRIME_UTR
1	78601465	GIPC2	-	T	-/T	ins	0.567376	141	3PRIME_UTR
1	179271948	SOAT1	-	T	-/T	ins	0.36246	309	INTRONIC
1	192780088	RGS2	CT	-	-/-	del	0.843284	134	INTRONIC	WITHIN_NON_CODING_GENE	WITHIN_NON_CODING_GENE
1	204394888	RP11	A	-	A/-	del	0.45	140	WITHIN_NON_CODING_GENE	INTRONIC	INTRONIC
1	227381674	CDC42BPA	A	-	A/-	del	0.591549	71	INTRONIC	WITHIN_NON_CODING_GENE
1	234564864	TARBP1	AA	-	AA/-	del	0.51049	143	INTRONIC
1	241712110	KMO	-	T	-/T	ins	0.714286	49	INTRONIC	WITHIN_NON_CODING_GENE	WITHIN_NON_CODING_GENE	WITHIN_NON_CODING_GENE	WITHIN_NON_CODING_GENE
1	248458875	OR2T12	T	-	T/-	del	0.318885	323	FRAMESHIFT_CODING
2	37487341	PRKD3	A	-	A/-	del	0.278689	122	INTRONIC	WITHIN_NON_CODING_GENE
2	44161854	LRPPRC	-	A	-/A	ins	0.236686	169	INTRONIC
2	74542088		CTC	-	CTC/-	del	0.486692	263
2	179330468		A	-	A/-	del	0.807692	78
2	203749284		-	A	-/A	ins	0.545455	44
2	218762662		TCC	-	TCC/-	del	0.342857	35
2	232320856		-	A	-/A	ins	0.253012	83
3	38739682	SCN10A	G	-	G/-	del	0.46	50	FRAMESHIFT_CODING
3	105266412	ALCAM	T	-	T/-	del	0.666667	246	INTRONIC	WITHIN_NON_CODING_GENE
3	108179219	MYH15	-	A	-/A	ins	0.263158	57	INTRONIC	SPLICE_SITE	WITHIN_NON_CODING_GENE
3	113729786	KIAA1407	G	-	G/-	del	0.4	80	FRAMESHIFT_CODING	3PRIME_UTR	WITHIN_NON_CODING_GENE	INTRONIC
3	120975997	STXBP5L	-	T	-/T	ins	0.459459	185	INTRONIC
3	156867776	CCNL1	-	AA	-/AA	ins	0.183406	229	INTRONIC	WITHIN_NON_CODING_GENE	WITHIN_NON_CODING_GENE	WITHIN_NON_CODING_GENE	WITHIN_NON_CODING_GENE	WITHIN_NON_CODING_GENE	WITHIN_NON_CODING_GENE	WITHIN_NON_CODING_GENE	WITHIN_NON_CODING_GENE
4	3521754	LRPAP1	-	T	T/T	ins	0.92	25	INTRONIC
4	25316928	ZCCHC4	CT	-	CT/-	del	0.38674	181	INTRONIC
4	101108875	DDIT4L	T	-	T/-	del	0.382353	68	FRAMESHIFT_CODING
4	104065805	CENPE	A	-	A/-	del	0.407407	27	INTRONIC
4	170991811	AADAT	GGTT	-	GGTT/-	del	0.783333	60	INTRONIC	SPLICE_SITE	SPLICE_SITE	SPLICE_SITE
5	21975174	CDH12	-	A	-/A	ins	0.458065	465	INTRONIC
5	52365923	ITGA2	-	TT	-/TT	ins	0.615385	39	INTRONIC
5	65088487	NLN	T	-	T/-	del	0.597633	169	INTRONIC	SPLICE_SITE	FRAMESHIFT_CODING	SPLICE_SITE
6	29796434	HLA	C	-	C/-	del	0.457143	35	FRAMESHIFT_CODING	INTRONIC	WITHIN_NON_CODING_GENE	WITHIN_NON_CODING_GENE	INTRONIC
6	31777770	HSPA1L	G	-	G/-	del	0.376812	69	3PRIME_UTR
6	32164665	NOTCH4	T	-	T/-	del	0.490347	259	WITHIN_NON_CODING_GENE	INTRONIC	INTRONIC	INTRONIC
6	32336520	C6orf10	G	-	-/-	del	0.952381	21	INTRONIC
6	34497158	PACSIN1	-	C	-/C	ins	0.418605	43	INTRONIC	WITHIN_NON_CODING_GENE
6	105192107	HACE1	AAC	-	AAC/-	del	0.521429	140	INTRONIC	ESSENTIAL_SPLICE_SITE	ESSENTIAL_SPLICE_SITE	ESSENTIAL_SPLICE_SITE	ESSENTIAL_SPLICE_SITE
6	110725977	DDO	T	-	-/-	del	0.923077	26	SPLICE_SITE	FRAMESHIFT_CODING	INTRONIC	FRAMESHIFT_CODING	WITHIN_NON_CODING_GENE
6	112438912	LAMA4	A	-	-/-	del	0.911765	102	INTRONIC
7	15427176	TMEM195-001	-	A	-/A	ins	0.464567	127	INTRONIC
7	34981410	DPY19L1-001	AT	-	AT/-	del	0.24237	557	FRAMESHIFT_CODING
7	66103435	KCTD7-001	-	AGGA	-/AGGA	ins	0.363636	66	INTRONIC
7	81612686	CACNA2D1-001	A	-	A/-	del	0.155556	135	INTRONIC
7	94027043	COL1A2-201	-	T	-/T	ins	0.331361	338	INTRONIC
7	121942442	FEZF1-001	A	-	A/-	del	0.43662	71	INTRONIC
7	126086436	GRM8-001	-	A	-/A	ins	0.370079	127	INTRONIC	WITHIN_NON_CODING_GENE	WITHIN_NON_CODING_GENE
8	363199	FBXO25-201	AT	-	AT/-	del	0.783019	106	5PRIME_UTR	FRAMESHIFT_CODING	FRAMESHIFT_CODING	FRAMESHIFT_CODING
8	82391183	FABP4-201	-	G	-/G	ins	0.495575	113	INTRONIC
8	131179873	ASAP1-202	A	-	A/-	del	0.730159	126	INTRONIC	SPLICE_SITE	SPLICE_SITE
9	99130538	SLC35D2-001	-	T	-/T	ins	0.566038	106	INTRONIC	WITHIN_NON_CODING_GENE
9	111903890	C9orf4-001	-	A	-/A	ins	0.410156	256	INTRONIC
10	27342285	ANKRD26-201	TCT	-	TCT/-	del	0.75	96	5PRIME_UTR
10	51956493		-	T	-/T	ins	0.340067	297
10	69785435		-	A	-/A	ins	0.282723	191
10	102238799		-	C	-/C	ins	0.69	100
10	111893373		TAAA	-	TAAA/-	del	0.529412	34
10	115991227		T	-	T/-	del	0.864286	140
11	18428637	LDHA-001	-	T	-/T	ins	0.351351	37	INTRONIC
11	58891961	FAM111B-202	T	-	T/-	del	0.265625	256	FRAMESHIFT_CODING
11	64543926	SF1-006	G	-	G/-	del	0.540541	222	INTRONIC	WITHIN_NON_CODING_GENE	FRAMESHIFT_CODING	WITHIN_NON_CODING_GENE	WITHIN_NON_CODING_GENE
11	68566648	CPT1A-202	-	C	C/C	ins	0.927711	83	INTRONIC
11	105850471	GRIA4-201	-	A	-/A	ins	0.318182	44	3PRIME_UTR
12	15037187	MGP-201	-	A	-/A	ins	0.755556	45	INTRONIC	SPLICE_SITE
12	32977103	PKP2-202	-	A	A/A	ins	0.840764	157	INTRONIC	SPLICE_SITE	SPLICE_SITE
12	45803310	ANO6-204	-	A	A/A	ins	0.858696	276	INTRONIC
12	48882759	C12orf54-202	T	-	-/-	del	0.868132	91	INTRONIC
12	52387743	ACVR1B-201	-	T	T/T	ins	0.833333	30	INTRONIC
12	57464685	TMEM194A-202	-	A	A/A	ins	0.813953	129	INTRONIC
13	31526785	C13orf26-001	-	T	T/T	ins	0.824859	177	INTRONIC
13	32914437	BRCA2-001	T	-	-/-	del	0.826425	386	FRAMESHIFT_CODING
13	33270970	PDS5B-006	T	-	-/-	del	0.928571	182	INTRONIC
13	48653957	MED4-005	AC	-	-/-	del	0.839161	286	WITHIN_NON_CODING_GENE	INTRONIC	INTRONIC	INTRONIC	INTRONIC
14	50735846	L2HGDH-002	-	A	-/A	ins	0.445946	74	INTRONIC
14	73570232	RBM25-201	-	T	T/T	ins	0.814286	70	INTRONIC
14	73716716	PAPLN-203	C	-	-/-	del	0.923077	39	FRAMESHIFT_CODING
14	81953889	SEL1L-202	-	A	-/A	ins	0.695341	279	INTRONIC	SPLICE_SITE	WITHIN_NON_CODING_GENE
14	101433385		AAG	-	AAG/-	del	0.746479	213
15	43677975	TUBGCP4-201	T	-	T/-	del	0.277311	119	INTRONIC
15	45560040	SLC28A2-001	AA	-	AA/-	del	0.555556	45	INTRONIC
15	64967891		AAG	-	AAG/-	del	0.43	100
15	99467942		GT	-	GT/-	del	0.302326	43
16	58147899	C16orf80-001	G	-	G/-	del	0.300469	213	3PRIME_UTR
17	39183011	KRTAP1-5-001	G	-	G/-	del	0.27619	105	FRAMESHIFT_CODING
19	10270746	DNMT1-202	AA	-	AA/-	del	0.547619	42	INTRONIC	SPLICE_SITE	SPLICE_SITE
19	21720434	ZNF429-201	A	-	A/-	del	0.52381	147	FRAMESHIFT_CODING
19	35250690	ZNF599-201	AG	-	AG/-	del	0.52381	126	FRAMESHIFT_CODING	WITHIN_NON_CODING_GENE
19	55697752	PTPRH-202	G	-	G/-	del	0.65625	32	INTRONIC
20	4855384	SLC23A2-201	TC	-	TC/-	del	0.742424	66	INTRONIC	WITHIN_NON_CODING_GENE	WITHIN_NON_CODING_GENE
20	49551779	DPM1-005	-	A	-/A	ins	0.345912	159	INTRONIC	SPLICE_SITE	WITHIN_NON_CODING_GENE	SPLICE_SITE	SPLICE_SITE	SPLICE_SITE	WITHIN_NON_CODING_GENE	SPLICE_SITE
21	37661041	DOPEY2-001	-	T	-/T	ins	0.435115	131	INTRONIC
23	151514195	GABRA3-001	-	A	A/A	ins	0.818182	11	INTRONIC
