# Supplementary material for: Comprehensive Genomic Analysis of a BRCA2 Deficient Human Pancreatic Cancer
Source: PLoS One. 2011 Jul 5;6(7):e21639. doi: 10.1371/journal.pone.0021639 (PMC3130048; doi:10.1371/journal.pone.0021639)
Supplement: Table S9 — Number of SNVs and Indels validated by Sanger sequencing. List of Sanger sequencing validated SNVs and Indels are shown. (XLS) [file pone.0021639.s009.xls]

## Sheet: Validated variants
Table S9: Number of SNVs and Indels validated by Sanger sequencing.
Variants validated by Sanger sequencing
Type	Protein effect	Candidates	Selected	Validated	Validation rate
Indels	frameshift	19	8	7	0.875
SNVs	stop gained	7	5	5	1
